# Supplementary material for: Enhancing prime editing by Csy4-mediated processing of pegRNA
Source: PubMed Central journal article supplement (PMC8486859; doi:10.1038/s41422-021-00520-x), 2021-06-08
Supplement: 41422_2021_520_MOESM1_ESM.pdf [file 41422_2021_520_MOESM1_ESM.pdf]

## **SUPPLEMENTARY INFORMATION**

### **Materials and Methods**

#### **Plasmid construction**

Prime editing system plasmid was purchased from Addgene (Addgene, #132775). pegRNA plasmid was constructed according to the methods described in our previous study<sup>1</sup>. To construct pU6-Csy4RS-gRNA plasmids, the plasmid backbone was amplified from pGL3-U6-sgRNA-EGFP (Addgene, #107721) using Phanta® Max Super Fidelity DNA Polymerase (Vazyme) (Supplementary information, Table S1). The backbone amplicon was then cut by BsaI-HFv2 (NEB) for overhangs. Spacer oligos (the top strand oligo includes 5' ACCG and 3' GTTTC overhangs, while the bottom strand oligo comprises a 5' CTCTGAAAC overhang) were synthesized. pegRNA 3' extension, Csy4 recognition site, and the spacer of nick-sgRNA were synthesized on an oligo (the top strand oligo included 5' GTGC overhang while the bottom strand oligo included 5' AAAC overhang), sgRNA scaffold oligos (featuring compatible overhangs) were synthesized (Supplementary information, Tables S1–S4). The sequence of Csy4 was synthesized by GENEWIZ and cloned to the prime editor using ClonExpress II One Step Cloning Kit (Vazyme, C112-01).

#### **Cell culture, transfection, and harvest**

HEK293T, HeLa, and Neuro-2a (N2a) cells were cultured in Dulbecco's Modified Eagle Medium (Gibco) supplemented with 10% fetal bovine serum (FBS) (v/v) (Gemini) and incubated at 37 °C with 5% CO<sub>2</sub>. For plasmid transfection, cells were seeded on poly-D-lysine-coated 24-well plates and transfected at approximately 70% confluence using EZ Trans (Shanghai Life iLab Biotech Co., Ltd), according to the manufacturer's protocols. A total of 900 ng prime editor, 300 ng pegRNA, and 100 ng corresponding nick sgRNA were transfected into cells per well. 72 h after transfection, GFP+ cells were collected from Fluorescence Activating Cell Sorter (FACS).

#### **Genomic DNA extraction and genotyping**

The genomic DNA of GFP+ cells was extracted using QuickExtract™ DNA Extraction Solution (Lucigen) according to manufacturer's protocols. The isolated DNA was PCR-amplified with Phanta® Max Super-Fidelity DNA Polymerase (Vazyme). Primers used are listed in Supplementary information, Table S5.

#### **T7EN1 cleavage assay**

Target region was PCR-amplified with Phanta® Max Super-Fidelity DNA Polymerase (Vazyme) from the genomic DNA of GFP+ cells. T7EN1 cleavage assay was performed according to the previous study<sup>2</sup>.

### **Targeted deep-sequencing**

Target sites were amplified with Phanta Max Super-Fidelity DNA Polymerase (Vazyme) and subjected to high-throughput sequencing with the Illumina Hiseq X Ten platform. To evaluate the prime editing efficiency, Fastq-multx (V1.3.1) was employed for splitting reads from pool-sequencing, BWA<sup>3</sup> (V0.7.17) and Samtools<sup>4</sup> (V1.7) were employed to map the paired-end reads, and the CRIPRESSO2 (V2.0.43)<sup>5</sup> was used to analyze the amplicons. Five prime editing info parameters were provided for CRIPRESSO2 which included pegRNA\_spacer\_seq, pegRNA\_extension\_seq, pegRNA\_scaffold\_seq, nicking\_guide\_seq and ref\_seq, and the other parameters required were set default. The reads only harboring correct edit were counted to evaluate the editing efficiency, and the reads harboring any undesired insertion or deletion were counted to evaluate the indel frequency.

### **Off-target analysis**

Potential off-target sites were predicted in the human genome (GRCh38/hg38) with Cas-OFFinder<sup>6</sup> (<http://www.rgenome.net/cas-offinder>): The region around the off-target sites were amplified with Phanta Max Super-Fidelity DNA Polymerase (Vazyme), and subjected to high-throughput sequencing with the Illumina Hiseq X Ten platform. The amplicons were analyzed with CRIPRESSO2 (V2.0.43) and the off-target sites are listed in Supplementary information, Table S6. Primers used are listed in Supplementary information, Table S7.

### **Data analysis**

All data were calculated based on three independent experiments, and Student's *t*-test (two-tailed) was used to calculate the statistical difference. Data are presented as means ± SD.

### **Data availability**

Targeted amplicon sequencing data has been deposited in the NCBI under BioProject number PRJNA687397.

### **References**

- 1 Liu, Y. *et al.* Efficient generation of mouse models with the prime editing system. *Cell Discov* **6**, 27 (2020).

- 2 Shen, B. *et al.* Generation of gene-modified mice via Cas9/RNA-mediated gene targeting. *Cell Res* **23**, 720-723 (2013).
- 3 Li, H. & Durbin, R. Fast and accurate short read alignment with Burrows-Wheeler transform. *Bioinformatics* **25**, 1754-1760 (2009).
- 4 Li, H. *et al.* The Sequence Alignment/Map format and SAMtools. *Bioinformatics* **25**, 2078-2079 (2009).
- 5 Clement, K. *et al.* CRISPResso2 provides accurate and rapid genome editing sequence analysis. *Nat Biotechnol* **37**, 224-226 (2019).
- 6 Bae, S., Park, J. & Kim, J. S. Cas-OFFinder: a fast and versatile algorithm that searches for potential off-target sites of Cas9 RNA-guided endonucleases. *Bioinformatics* **30**, 1473-1475 (2014).
- 7 Anzalone, A. V. *et al.* Search-and-replace genome editing without double-strand breaks or donor DNA. *Nature* **576**, 149-157 (2019).

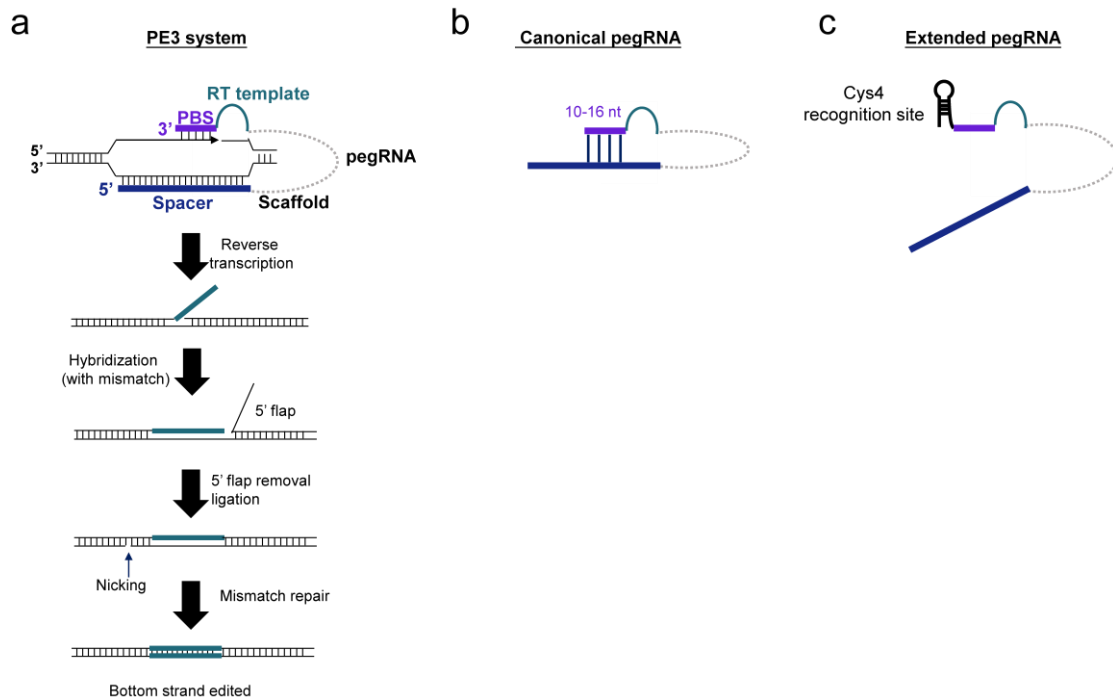

**Supplementary information, Fig. S1 Diagrams of PE3 system and pegRNAs.**

- a.** Principle of Prime Editor 3<sup>7</sup>. The first component of the system is pegRNA, which is the same as the conventional Cas9 gRNA except that it additionally carries a reverse transcriptase (RT) template and a primer binding site (PBS) at the 3' end. The pegRNA recruits the second component of the system, a fusion protein consisting of a Cas9 H840A nickase fused to a Moloney Murine Leukemia Virus (M-MLV) reverse transcriptase (not shown). The nickase cleaves the top strand, enabling the sequence upstream of the nick to serve as primer (arrow) for reverse transcription of the RT template. The cDNA then is incorporated into the top strand, and the bottom strand is subsequently nicked to repair the mismatch, copying the edit into the bottom strand in the process.
- b.** The PBS which is generally 10-16 nt at the 3' end of pegRNA is complementary to the spacer at its 5' end. PBS can potentially bind and sequester the spacer, thus hampering editing.
- c.** A potential strategy for countering PBS-spacer interaction. The extended pegRNA was generated by fusing a hairpin Csy4 recognition site to the 3' end of canonical pegRNA. Csy4 recognition site may prevent PBS from binding the spacer.

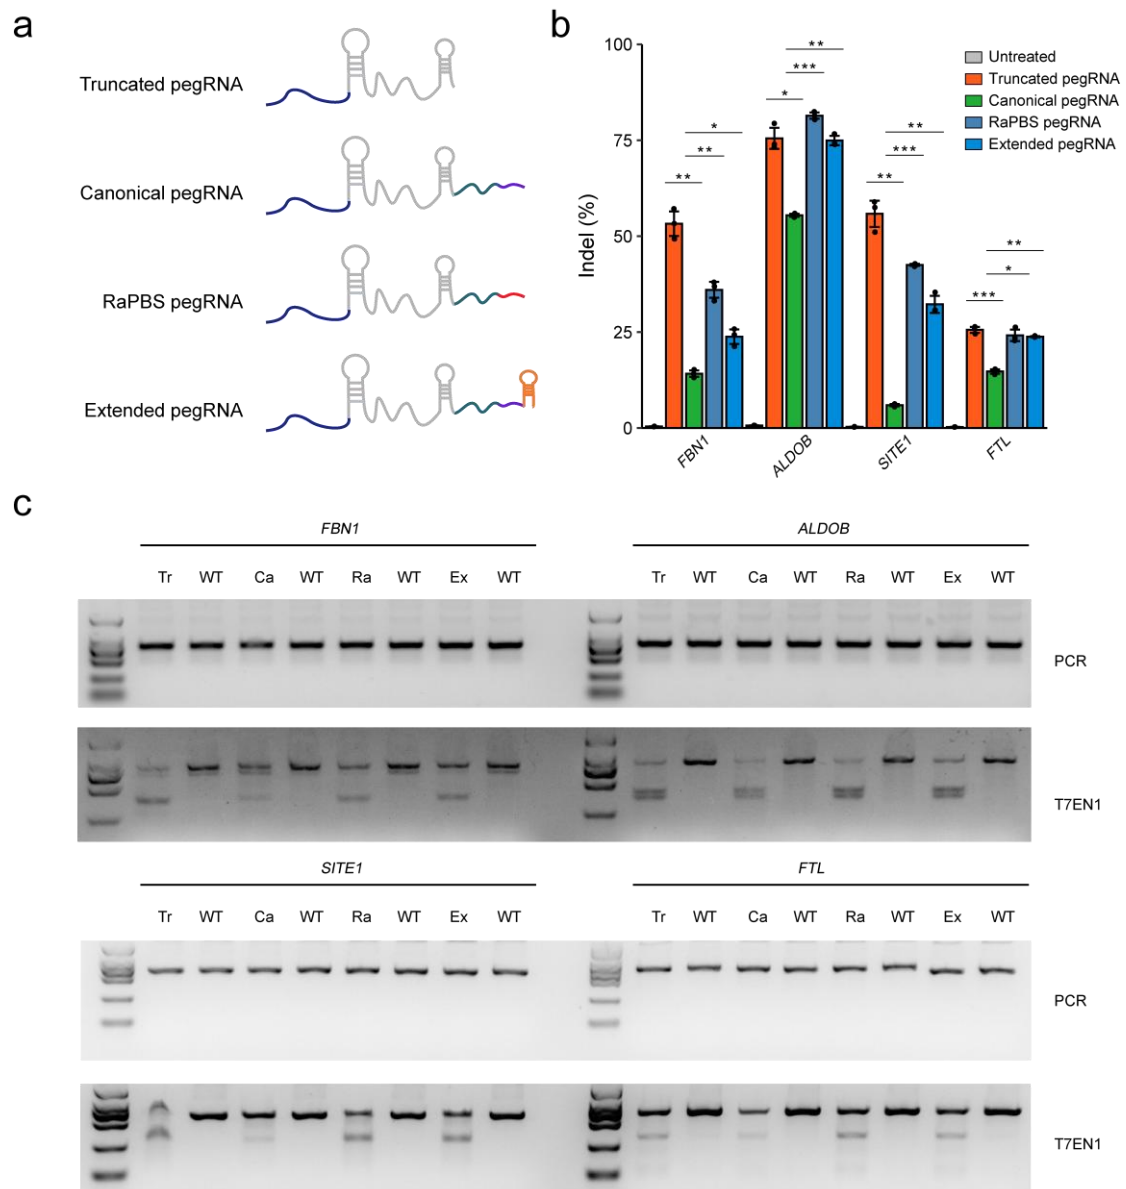

**Supplementary information, Fig. S2 Potential circularization of pegRNA weakens the pegRNA activity.**

- a.** The schematic image of differently engineered pegRNAs used for examining DNA cleavage by Cas9 with pegRNA. Truncated pegRNA (without PBS nor RT, same as a typically sgRNA), canonical pegRNA, RaPBS pegRNA (original PBS was replaced by random PBS of same size) and extended pegRNA are shown. Spacer of pegRNA was highlighted in dark blue, scaffold in grey, RT in cyan, PBS in purple, replaced PBS in red, and extended sequence, harpin Csy4 recognition site in orange.
- b.** Indels induced by different pegRNAs at 4 distinct sites in HEK293T cells. Indels was induced by Cas9 with different engineered pegRNA showed in (a) at *FBN1*, *ALDOB*, *SITE1* and *FTL* sites in

HEK293T cells. PCR amplicons from the target regions were analyzed by targeted deep sequencing. Mean values  $\pm$ SD, n=3 independent experiments (\* $P < 0.05$ , \*\* $P < 0.005$ , \*\*\* $P < 0.0005$ ).

- c. T7EN1 cleavage assay were used to evaluate the targeted indels of *FBNI*, *ALDOB*, *SITE1* and *FTL*.

|              |                  |                                                                                            |                                                               |
|--------------|------------------|--------------------------------------------------------------------------------------------|---------------------------------------------------------------|
| <i>FBN1</i>  | Canonical pegRNA | CCTAACTCTACTTTAGATTC...268bp...GCTTCCTGCTGCTGTTCTCTGGGTAAGGCC...90bp...CTTCTAGATCAGAAGACAA | Ref                                                           |
|              |                  | CCTAACTCTACTTTAGATTC...268bp...GCTTCCTGCTGCTGTTCTCTGGGTAAGGCC...90bp...CTTCTAGATCAGAAGACAA | WT (14/15)                                                    |
|              |                  | CCTAACTCTACTTTAGATTC...268bp...GCTTCCTGCTGCTGTTCTCTGGGTAAGGCC...90bp...CTTCTAGATCAGAAGACAA | Transition (1/15)                                             |
|              | Extended pegRNA  | CCTAACTCTACTTTAGATTC...268bp...GCTTCCTGCTGCTGTTCTCTGGGTAAGGCC...90bp...CTTCTAGATCAGAAGACAA | Ref                                                           |
|              |                  | CCTAACTCTACTTTAGATTC...268bp...GCTTCCTGCTGCTGTTCTCTGGGTAAGGCC...90bp...CTTCTAGATCAGAAGACAA | WT (9/13)                                                     |
|              |                  | CCTAACTCTACTTTAGATTC...268bp...GCTTCCTGCTGCTGTTCTCTGGGTAAGGCC...90bp...CTTCTAGATCAGAAGACAA | +1bp (1/13)<br>-388bp (1/13)<br>-67+3bp (1/13)<br>-2bp (1/13) |
| <i>ALDOB</i> | Canonical pegRNA | TCTACGTCTTAGCTTGCTCA...97bp...CATGGAGCATCCACCCTGTGCTGAGTGATTGGAGGGAGAGAAGATTAGAGAAAG       | Ref                                                           |
|              |                  | TCTACGTCTTAGCTTGCTCA...97bp...CATGGAGCATCCACCCTGTGCTGAGTGATTGGAGGGAGAGAAGATTAGAGAAAG       | WT (3/13)                                                     |
|              |                  | TCTACGTCTTAGCTTGCTCA...97bp...CATGGAGCATCCACCCTGTGCTGAGTG...TGGAGGGAGAGAAGATTAGAGAAAG      | -2bp (1/13)                                                   |
|              |                  | TCTACGTCTTAGCTTGCTCA...97bp...CATGGAGCATCCACCCTGTGCTGAGT...AGAGAAAG                        | -20bp (1/13)                                                  |
|              |                  | TCTACGTCTTAGCTTGCTCA...97bp...CATGGAGCATCCA...GGGAGAGAAGATTAGAGAAAG                        | -21bp (1/13)                                                  |
|              |                  | TCTACGTCTTAGCTTGCTCA...97bp...CATGGAGCATCCACCCTGTGCTGAGT...TGGAGGGAGAGAAGATTAGAGAAAG       | -4bp (1/13)                                                   |
|              | Extended pegRNA  | TCTACGTCTTAGCTTGCTCA...97bp...CATGGAGCATCCACCCTGTGCTGAGTG...AGAGAAGATTAGAGAAAG             | -10bp (2/13)                                                  |
|              |                  | TCTACGTCTTAGCTTGCTCA...97bp...CATGGAGCATCCACCCTGTGCTGAGTGATTGGAGGGAGAGAAGATTAGAGAAAG       | +10bp (1/13)                                                  |
|              |                  | TCTACGTCTTAGCTTGCTCA...97bp...CATGGAGCATCCACCCTGTGCTGAGT...TATTGGAGGGAGAGAAGATTAGAGAAAG    | -1bp (1/13)                                                   |
|              |                  | TCTACGTCTTAGCTTGCTCA...97bp...CATGGAGCATCCACCCTGTG...TATTGGAGGGAGAGAAGATTAGAGAAAG          | -7bp (1/13)                                                   |
|              |                  | TCTACGTCTTAGCTTGCTCA...97bp...CATGGAGCATCCACCCTGTGCTGAGT...ATTGGAGGGAGAGAAGATTAGAGAAAG     | -2bp (1/13)                                                   |
|              |                  | TCTACGTCTTAGCTTGCTCA...97bp...CATGGAGCATCCACCCTGTGCTG...TATTGGAGGGAGAGAAGATTAGAGAAAG       | -4bp (1/10)                                                   |
| <i>SITE1</i> | Canonical pegRNA | CTCCTCTCATATTTGTCTTAGGCTAACTGCCAGGCGGCCAAAGGACAGTATGTTACACGGGTTCTCTGGGGCTGCT               | Ref                                                           |
|              |                  | CTCCTCTCATATTTGTCTTAGGCTAACTGCCAGGCGGCCAAAGGACAGTATGTTACACGGGTTCTCTGGGGCTGCT               | WT (17/17)                                                    |
|              |                  | CTCCTCTCATATTTGTCTTAGGCTAACTGCCAGGCGGCCAAAGGACAGTATGTTACACGGGTTCTCTGGGGCTGCT               | Ref                                                           |
|              | Extended pegRNA  | CTCCTCTCATATTTGTCTTAGGCTAACTGCCAGGCGGCCAAAGGACAGTATGTTACACGGGTTCTCTGGGGCTGCT               | WT (8/13)                                                     |
|              |                  | CTCCTCTCATATTTGTCTTAGGCTAACTGCCAGGCGGCCAAAGGACAGTATGTTACACGGGTTCTCTGGGGCTGCT               | -3bp (1/13)                                                   |
|              |                  | CTCCTCTCATATTTGTCTTAGGCTAACTGCCAGGCGGCCAAAGGACAGTATGTTACACGGGTTCTCTGGGGCTGCT               | -3bp (1/13)                                                   |
|              |                  | CTCCTCTCATATTTGTCTTAGGCTAACTGCCAGGCGGCCAAAGGACAGTATGTTACACGGGTTCTCTGGGGCTGCT               | +1bp (1/13)                                                   |
|              |                  | CTCCTCTCATATTTGTCTTAGGCTAACTGCCAGGCGGCCAAAGGACAGTATGTTACACGGGTTCTCTGGGGCTGCT               | +1bp (1/13)                                                   |
|              |                  | CTCCTCTCATATTTGTCTTAGGCTAACTGCCAGGCGGCCAAAGGACAGTATGTTACACGGGTTCTCTGGGGCTGCT               | -1bp (1/13)                                                   |
|              |                  | CTCCTCTCATATTTGTCTTAGGCTAACTGCCAGGCGGCCAAAGGACAGTATGTTACACGGGTTCTCTGGGGCTGCT               | Ref                                                           |
|              |                  | CTCCTCTCATATTTGTCTTAGGCTAACTGCCAGGCGGCCAAAGGACAGTATGTTACACGGGTTCTCTGGGGCTGCT               | WT (9/10)                                                     |
|              |                  | CTCCTCTCATATTTGTCTTAGGCTAACTGCCAGGCGGCCAAAGGACAGTATGTTACACGGGTTCTCTGGGGCTGCT               | +1bp (1/10)                                                   |
| <i>FTL</i>   | Canonical pegRNA | CTTCCCGTAGGGCTTCTATTTCGACCCGCGATGATGGCTCTGGAAGGCGTGAGCCACTTCTTCGCGAATTGGCCGAGGA            | Ref                                                           |
|              |                  | CTTCCCGTAGGGCTTCTATTTCGACCCGCGATGATGGCTCTGGAAGGCGTGAGCCACTTCTTCGCGAATTGGCCGAGGA            | WT (9/10)                                                     |
|              | Extended pegRNA  | CTTCCCGTAGGGCTTCTATTTCGACCCGCGATGATGGCTCTGGAAGGCGTGAGCCACTTCTTCGCGAATTGGCCGAGGA            | +1bp (3/13)                                                   |

**Supplementary information, Fig. S3 T-A clones confirmed the discrepancy of indels induced by Cas9 with extended pegRNA and canonical pegRNA.**

T-A clones were used to evaluate indels induced by Cas9 with canonical pegRNAs and extended pegRNAs at *FBN1*, *ALDOB*, *SITE1* and *FTL* sites. N/N indicates the number of colonies with indels out of the number of total samples.

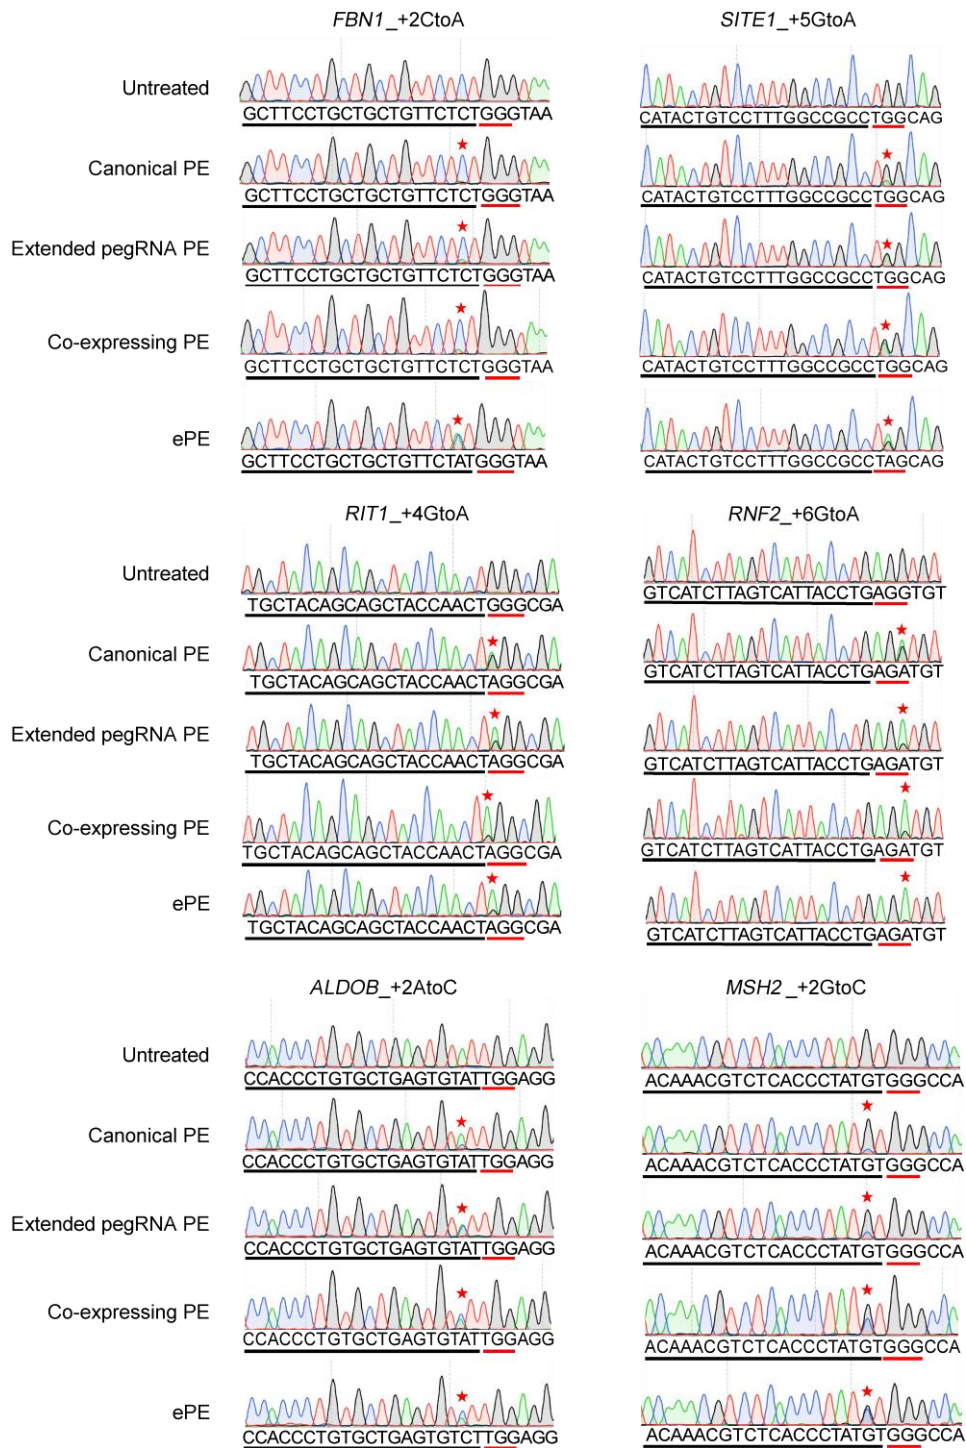

**Supplementary information, Fig. S4 Base transition and transversion induced by canonical PE, extended pegRNA PE, co-expressing PE and ePE in HEK293T cells.**

Sanger sequencing chromatograms of the six sites in **Fig. 1c**. Asterisks indicate the desired editing.

The PAM sequence and spacer sequence of pegRNA are underlined in red and black, respectively.



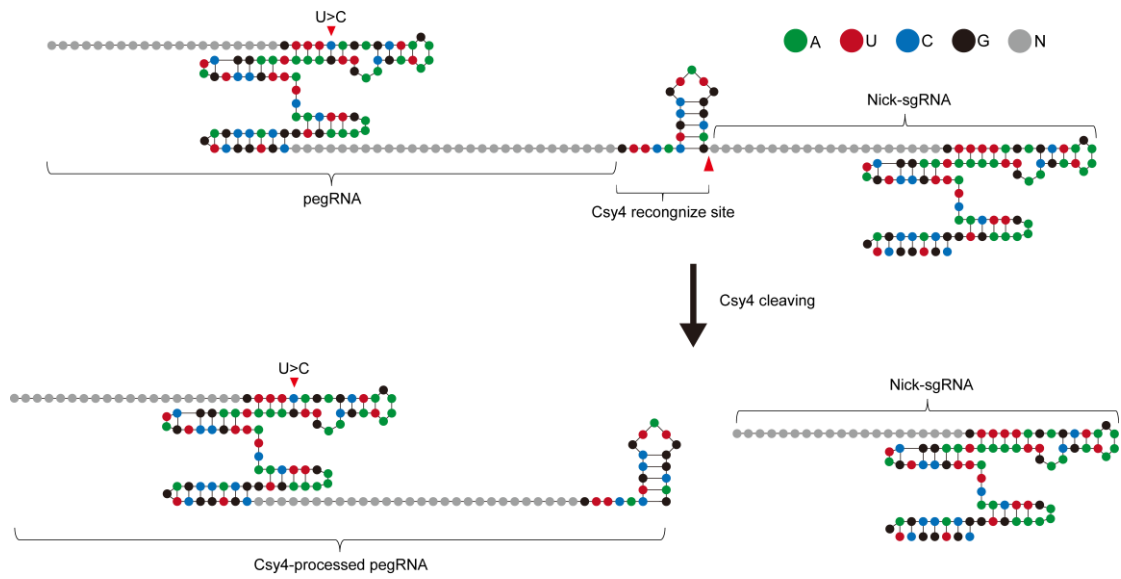

**Supplementary information, Fig. S5 RNA sequences of co-expressed pegRNA and nick-sgRNA.**

Co-expressed extended pegRNA and nick-sgRNA. Red triangle indicates the cleave site of Csy4 nuclease.

Csy4 nuclease cleaves and releases Csy4-processed pegRNA and nick-sgRNA.

## pCMV-Csy4-NMRT coding sequence

(Csy4 colored in red, T2A peptide colored in grey, NLS colored in green, linker colored in purple, Cas9 H840A colored in blue, RTase colored yellow)

ATGGACCACTACCTCGACATTCGCTTGGACCGGACCCGGAATTTCCCCGGCGCAACTCATGAGCGTGCTCTTC  
GGCAAGCTCCACCAGGCCCTGGTGGCACAGGGCGGGGACAGGATCGGCGTGAGCTTCCCCGACCTCGACGAA  
AGCCGCTCCCGGCTGGGCGAGCGCTGCGCATTGCTCGGCGGACGACCTTCGTGCCCTGCTCGCCCGGC  
CCTGGCTGGAAGGGTTGCGGGACCATCTGCAATTCGGAGAACCGGCAGTCGTGCCTCACCCACACCGTACCGT  
CAGGTCAGTCGGGTTAGGCGAAAAGCAATCCGGAACGCCTGCGGCGGCGGCTCATGCGCCGCGCACGATCTGA  
GTGAGGAGGAGGCTCGAAACGCATTCCCGATACGGTCGCGAGAGCCTTGGACCTGCCCTTCGTACGCTACGC  
AGCCAGAGCACCGGACAGCACTTCCGTCTCTTCATCCGCCACGGGCCGTTGCAGGTGACGGCAGAGGAAGGAG  
GATTACCTGTTACGGGTTGAGCAAAGGAGGTTTCGTTCCCTGGTTTCGAGGGCAGAGGAAGTCTGTTAACATGCG  
GTGACGTCGAGGAGAATCCTGGCCACCAAAGAAGAAGCGGAAAGTGCACAAGAAGTACAGCATCGGCCTGGAC  
ATCGGCACCAACTCTGTGGGCTGGGCCGTGATCACCGACGAGTACAAGGTGCCAGCAAGAAATTCAAGTGCT  
GGGCAACACCGACCGGCACAGCATCAAGAAGAACCTGATCGGAGCCCTGCTGTTGACAGCGGCGAAACAGCC  
GAGGCCACCCGGCTGAAGAGAACCGCCAGAAGAAGATACACCAGACGGAAGAACCGGATCTGCTATCTGCAAGA  
GATCTTCAGCAACGAGATGGCCAAGGTGGACGACAGCTTCTCCACAGACTGGAAGAGTCTTCCTGGTGGAAAG  
AGGATAAGAAGCACGAGCGGCACCCCATCTTCGGCAACATCGTGGACGAGGTGGCCTACCACGAGAAGTACCCC  
ACCATCTACCACCTGAGAAAGAACTGGTGGACAGCACCGACAAGGCCGACCTGCGGCTGATCTATCTGGCCCT  
GGCCACATGATCAAGTTCGGGGGCCACTTCTGATCGAGGGCGACCTGAACCCCGACAACAGCGACGTGGACA  
AGCTGTTTCATCCAGCTGGTGCAGACCTACAACCAGCTGTTTCGAGGAAAACCCCATCAACGCCAGCGGCGTGGAC  
GCCAAGGCCATCCTGTCTGCCAGACTGAGCAAGAGCAGACGGCTGGAAAATCTGATCGCCAGCTGCCCGGCG  
AGAAGAAGAATGGCCTGTTGGAACCTGATTGCCCTGAGCCTGGGCCTGACCCCAACTTCAAGAGCAACTTC  
GACCTGGCCGAGGATGCCAACTGCAGCTGAGCAAGGACACCTACGACGACGACCTGGACAACCTGCTGGCC  
AGATCGGCGACCAAGTACGCCGACCTGTTTCTGGCCGCCAAGAACCTGTCCGACGCCATCCTGCTGAGCGACATC  
CTGAGAGTGAACACCGAGATCACCAAGGCCCCCTGAGCGCCTCTATGATCAAGAGATACGACGAGCACCACCA  
GGACCTGACCCTGCTGAAAGCTCTCGTGCGGCAGCAGCTGCCTGAGAAGTACAAGAGATTTTCTTCGACCAGA  
GCAAGAACGGCTACGCCGGCTACATTGACGGCGGAGCCAGCCAGGAAGAGTTCTACAAGTTCATCAAGCCCATC  
CTGGAAAAGATGGACGGCACCGAGGAACCTGCTCGTGAAGCTGAACAGAGAGGACCTGCTGCGGAAGCAGCGGA  
CCTTCGACAACGGCAGCATCCCCACCAGATCCACCTGGGAGAGCTGCACGCCATTCTGCGGCGGCAGGAAGAT  
TTTTACCCATTCTGAAGGACAACCGGGAAAAGATCGAGAAGATCCTGACCTTCGCATCCCCTACTACGTGGGC  
CCTCTGGCCAGGGGAAAACAGCAGATTGCCTGGATGACCAGAAAGAGCGAGGAAACCATCACCCCTGGAACCT  
CGAGGAAGTGGTGGACAAGGGCGCTTCCGCCAGAGCTTCATCGAGCGGATGACCAACTTCGATAAGAACCTGC  
CCAACGAGAAGGTGCTGCCAAGCACAGCCTGCTGTACGAGTACTTCACCGTGTATAACGAGCTGACCAAAGTGA  
AATACGTGACCGAGGGAATGAGAAAGCCCGCCTTCTGAGCGGCGAGCAGAAAAGGCCATCGTGGACCTGCTG  
TTCAAGACCAACCGGAAAGTGACCGTGAAGCAGCTGAAAGAGGACTACTTCAAGAAAATCGAGTGCTTCGACTCC  
GTGGAAATCTCCGGCGTGAAGATCGGTTCAACGCCTCCCTGGGCACATACCACGATCTGCTGAAAATTATCAAG  
GACAAGGACTTCTGGACAATGAGGAAAACGAGGACATTCTGGAAGATATCGTGCTGACCCTGACACTGTTTGAG  
GACAGAGAGATGATCGAGGAACGGCTGAAAACCTATGCCACCTGTTTCGACGACAAAAGTGATGAAGCAGCTGAA  
GCGGCGGAGATACCCGGCTGGGGCAGGCTGAGCCGGAAGCTGATCAACGGCATCCGGGACAAGCAGTCCGG  
CAAGACAATCCTGGATTTCTGAAGTCCGACGGCTTCGCCAACAGAACTTCATGCAGCTGATCCACGACGACAG  
CCTGACCTTTAAAGAGGACATCCAGAAAGCCAGGTGTCCGGCCAGGGCGATAGCCTGCACGAGCACATTGCCA  
ATCTGGCCGGCAGCCCCGCCATTAAGAAGGGCATCCTGCAGACAGTGAAGGTGGTGGACGAGCTCGTGAAAGTG  
ATGGGCCGGCACAAAGCCCGAGAACATCGTGATCGAAATGGCCAGAGAGAACCAGACCACCCAGAAGGGACAGAA  
GAACAGCCGCGAGAGAATGAAGCGGATCGAAGAGGGCATCAAAGAGCTGGGCAGCCAGATCCTGAAAGAACC  
CCGTGAAAACACCCAGCTGCAGAACGAGAAGCTGTACCTGTACTACCTGCAGAATGGGCGGGATATGTACGTGG

ACCAGGA ACTGGACATCAACCGGCTGTCCGACTACGATGTGGACGCTATCGTGCCTCAGAGCTTTCTGAAGGACG  
ACTCCATCGACAACAAGGTGCTGACCAGAAGCGACAAGAACCGGGGCAAGAGCGACAACGTGCCCTCCGAAGA  
GGTCGTGAAGAAGATGAAGAACTACTGGCGGCAGCTGCTGAACGCCAAGCTGATTACCCAGAGAAAAGTTTCGACA  
ATCTGACCAAGGCCGAGAGAGGGCGGCCTGAGCGAACTGGATAAGGCCGGCTTCATCAAGAGACAGCTGGTGGAA  
ACCCGGCAGATCACAAAGCACGTGGCACAGATCCTGGACTCCCGGATGAACACTAAGTACGACGAGAATGACAA  
GCTGATCCGGGAAGTGAAAAGTGATCACCCCTGAAGTCCAAGCTGGTGTCCGATTTCCGGAAGGATTTCCAGTTTTA  
CAAAGTGC GCGAGATCAACA ACTACCACCGCCACGACGCCTACCTGAACGCCGTCTGTGGGAACCGCCCTGA  
TCAAAAAGTACCCTAAGCTGGAAAGCGAGTTCGTGTACGGCGACTACAAGGTGTACGACGTGCGGAAGATGATCG  
CCAAGAGCGAGCAGGAAATCGGCAAGGCTACCGCCAAGTACTTCTTCTACAGCAACATCATGAACTTTTTCAAGAC  
CGAGATTACCCTGGCCAACGGCGAGATCCGGAAGCGGCCTCTGATCGAGACAAACGGCGAAACCGGGGAGATC  
GTGTGGGATAAGGGCCGGGATTTT GCCACCGTGCGGAAAGTGCTGAGCATGCCCAAGTGAATATCGTGAAAAAG  
ACCGAGGTGCAGACAGGCGGCTTCAGCAAAGAGTCTATCCTGCCAAGAGGAACAGCGATAAGCTGATCGCCAG  
AAAGAAGGACTGGGACCCTAAGAAGTACGGCGGCTTCGACAGCCCCACCGTGGCCTATTCTGTGCTGGTGGTGG  
CCAAAGTGGAAGGGCAAGTCCAAGAACTGAAGAGTGTGAAAGAGCTGCTGGGGATCACCATCATGGAAAGA  
AGCAGCTTCGAGAAGAATCCCATCGACTTTCTGGAAGCCAAGGGCTACAAAGAAGTGA AAAAGGACCTGATCATC  
AAGCTGCCTAAGTACTCCCTGTTTCGAGCTGGAAAACGGCCGGAAGAGAATGCTGGCCTCTGCCGGCGAACTGCA  
GAAGGGAAACGAACTGGCCCTGCCCTCCAATATGTGAACTTCTGTACCTGGCCAGCCACTATGAGAAGCTGAA  
GGGCTCCCCCGAGGATAATGAGCAGAAACAGCTGTTTGTGGAACAGCACAAAGCACTACCTGGACGAGATCATCGA  
GCAGATCAGCGAGTTCTCCAAGAGAGTGATCCTGGCCGACGCTAATCTGGACAAAGTGCTGTCCGCCTACAACAA  
GCACCGGATAAGCCCATCAGAGAGCAGGCCGAGAATATCATCCACCTGTTTACCCTGACCAATCTGGGAGCCCC  
TGCCGCCTTCAAGTACTTTGACACCACCATCGACCGGAAGAGGTACACCAGCACCAAAGAGGTGCTGGACGCCA  
CCCTGATCCACCAGAGCATCACCGGCCTGTACGAGACACGGATCGACCTGTCTCAGCTGGGAGGTGACTCTGGA  
GGATCTAGCGGAGGATCCTCTGGCAGCGAGACACCAGGAACAAGCGAGTCAGCAACACCAGAGAGCAGTGGCG  
GCAGCAGCGGCGGCAGCAGC ACCCTAAATATAGAAGATGAGTATCGGCTACATGAGACCTCAAAAGAGCCAGATG  
TTTTCTTAGGGTCCACATGGCTGTCTGATTTTTCTCAGGCCTGGGCGGAAACCGGGGGCATGGGACTGGCAGTT  
CGCCAAGCTCCTCTGATCATACTCTGAAAAGCAACCTCTACCCCCGTGTCCATAAAACAATACCCCATGTCACAAG  
AAGCCAGACTGGGGATCAAGCCCCACATACAGAGACTGTTGGACCAGGGAATACTGGTACCCTGCCAGTCCCCC  
TGGAACACGCCCTGCTACCCGTTAAGAAACCAGGGACTAATGATTATAGGCCTGTCCAGGATCTGAGAGAAGTC  
AACAAGCGGGTGGAAGACATCCACCCCACCGTGCCCAACCCTTACAACCTCTTGAGCGGGCTCCCACCGTCCCA  
CCAGTGGTACACTGTGCTTGATTTAAAGGATGCCTTTTTCTGCCTGAGACTCCACCCCACCAGTCAGCCTCTCTTC  
GCCTTTGAGTGGAGAGATCCAGAGATGGGAATCTCAGGACAATTGACCTGGACCAGACTCCCACAGGGTTTTCAA  
AACAGTCCCACCCTGTTTAATGAGGCACTGCACAGAGACCTAGCAGACTTCCGGATCCAGCACCCAGACTTGATC  
CTGCTACAGTACGTGGATGACTTACTGCTGGCCGCCACTTCTGAGCTAGACTGCCAACAAGGTA CTGGGCCCTG  
TTACAAACCCTAGGGAACCTCGGGTATCGGGCCTCGGCCAAGAAAGCCCAAATTTGCCAGAAACAGGTCAAGTAT  
CTGGGGTATCTTCTAAAAGAGGGTCAGAGATGGCTGACTGAGGCCAGAAAAGAGACTGTGATGGGGCAGCCTAC  
TCCGAAGACCCCTCGACA ACTAAGGGAGTTCCTAGGGAAGGCAGGCTTCTGTGCCTCTTCATCCCTGGGTTTGC  
AGAAATGGCAGCCCCCTGTACCCTCTCACCAAACCGGGGACTCTGTTTAATTGGGGCCAGACCAACAAAAGGC  
CTATCAAGAAATCAAGCAAGCTCTTCTAACTGCCCCAGCCCTGGGGTTGCCAGATTTGACTAAGCCCTTTGAACTC  
TTTTGTCGACGAGAAGCAGGGCTACGCCAAAGGTGTCCTAACGCAAAA ACTGGGACCTTGGCGTCGGCCGGTGGC  
CTACCTGTCCAAAAGCTAGACCCAGTAGCAGCTGGGTGGCCCCCTTGCCCTACGGATGGTAGCAGCCATTGCCGT  
ACTGACAAAGGATGCAGGCAAGCTAACCATGGGACAGCCACTAGTCATTCTGGCCCCCATGCAGTAGAGGCACT  
AGTCAAACAACCCCCCGACCGCTGGCTTTCCAACGCCCGGATGACTCACTATCAGGCCTTGCTTTTGGACACGGA  
CCGGGTCCAGTTCGGACCGGTGGTAGCCCTGAACCCGGCTACGCTGCTCCCACTGCCTGAGGAAGGGCTGCAA  
CACA ACTGCCTTGATATCCTGGCCGAAGCCCACGGAACCCGACCCGACCTAACGGACCAGCCGCTCCCAGACGC  
CGACCACACCTGGTACACGGATGGAAGCAGTCTCTTACAAGAGGGACAGCGTAAGGCGGGAGCTGCGGTGACCA  
CCGAGACCGAGGTAATCTGGGCTAAAGCCCTGCCAGCCGGGACATCCGCTCAGCGGGCTGAACTGATAGCACTC  
ACCCAGGCCCTAAAGATGGCAGAAGGTAAGAAGCTAAATGTTTATACTGATAGCCGTTATGCTTTTGGTACTGCCCA  
TATCCATGGAGAAATATACAGAAGGCGTGGGTGGCTCACATCAGAAGGCAAAGAGATCAAAAATAAAGACGAGATC  
TTGGCCCTACTAAAAGCCCTCTTTCTGCCAAAAGACTTAGCATAATCCATTGTCCAGGACATCAAAAGGGACACA

GCGCCGAGGCTAGAGGCAACCGGATGGCTGACCAAGCGGCCCGAAAGGCAGCCATCACAGAGACTCCAGACAC  
CTCTACCCTCCTCATAGAAAATTCATCACCCCTCTGGCGGCTCAAAAAGAACCGCCGACGGCAGCGAATTCGAGCC  
CAAGAAGAAGAGGAAAGTCTAA

**pU6-Csy4RS-gRNA coding sequence**

(spacer of pegRNA colored grey, spacer of nick-sgRNA colored in yellow, scaffolds colored in blue, RT+PBS colored in red, Csy4 recognition site colored in purple)

NNNNNNNNNNNNNNNNNNNNNNNNNNNNGTTTCAGAGCTAGAAATAGCAAGTTGAAATAAGGCTAGTCCGTTATCAACTTGAAA  
AAGTGGCACCGAGTCGGTGCNNNNNNNNNNNNNNNNNNNNNNNNNNNNNNNNNNNNNNNNNNNTTCACTGCCGTATAGGCAGNNNNN  
NNNNNNNNNNNNNNNNNNNNNNNNNNNNNNNNNNNNNNNNNNNNNNNNNNNNNNNNNNNNNNNNNNNNNNNNNNNNNNNNNNNNNNNNNN  
GCACCGAGTCGGTGC

**Supplementary information, Fig. S6 Coding sequences of pCMV-Csy4-NMRT and pU6-Csy4RS-gRNA used in this study**

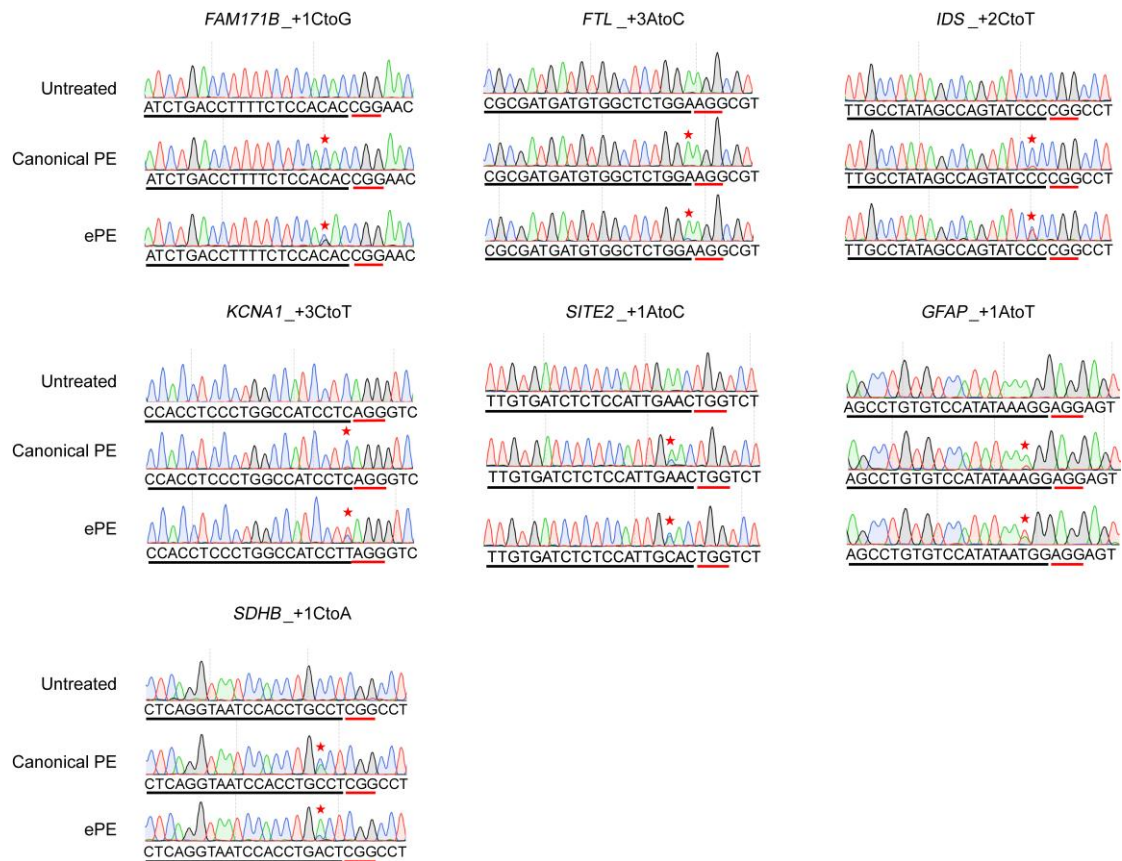

**Supplementary information, Fig. S7 Enhancing point mutation efficiency by ePE in HEK293T cells.**

Sanger sequencing chromatograms of targeted mutations by canonical PE and ePE of 7 sites indicated in **Fig. 1e** in HEK293T cells. Asterisks indicate the desired editing. The PAM sequence and spacer sequence of pegRNA are underlined in red and black, respectively.

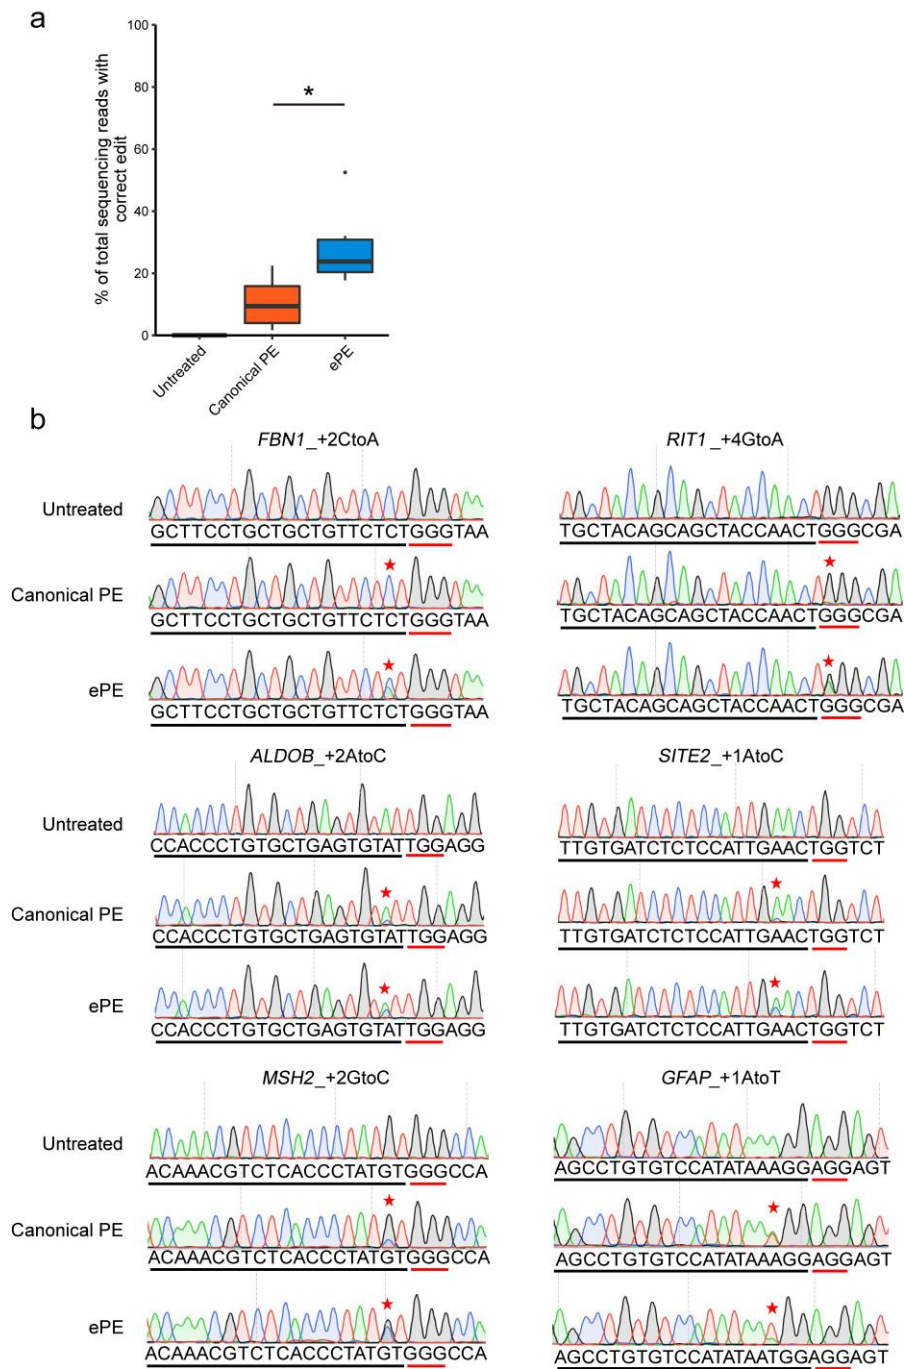

**Supplementary information, Fig. S8 ePE increases targeted base transition and transversion efficiency in HeLa cells.**

- a.** Statistical analysis of increase for targeted base transition and transversion in **Fig. 1g**. Data are presented as mean values  $\pm$  SD,  $n = 3$  independent experiments, two-tailed student's t-test ( $*P < 0.05$ ,  $**P < 0.005$ ,  $***P < 0.0005$ ).
- b.** Sanger sequencing chromatograms of the sites in **Fig. 1g**. The PAM sequence and spacer sequence of pegRNA are underlined in red and black, respectively. Asterisks indicate the desired editing.

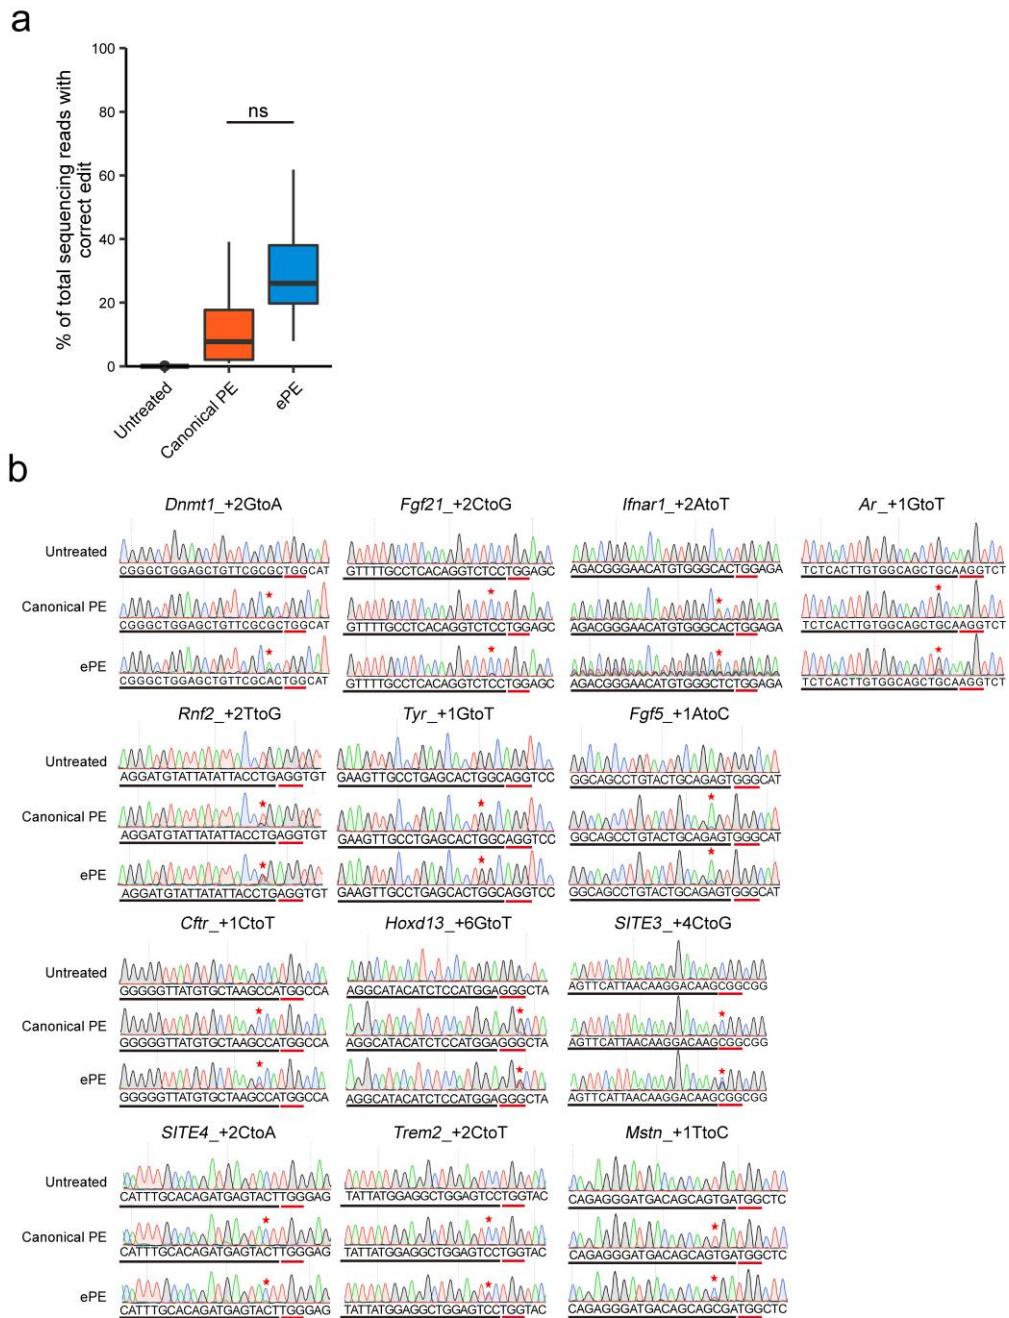

**Supplementary information, Fig. S9 Increasing base transition and transversion efficiency by ePE in N2a cells.**

- Statistical analysis of efficiency of targeted base transition and transversion in **Fig. 1h**. Data are presented as mean values  $\pm$  SD,  $n = 3$  independent experiments, two-tailed student's  $t$ -test ( $*P < 0.05$ ,  $**P < 0.005$ ,  $***P < 0.0005$ ).
- Sanger sequencing chromatograms of the sites in **Fig. 1h**. The PAM sequence and spacer sequence of pegRNA are underlined in red and black, respectively. Asterisks indicate the desired editing.

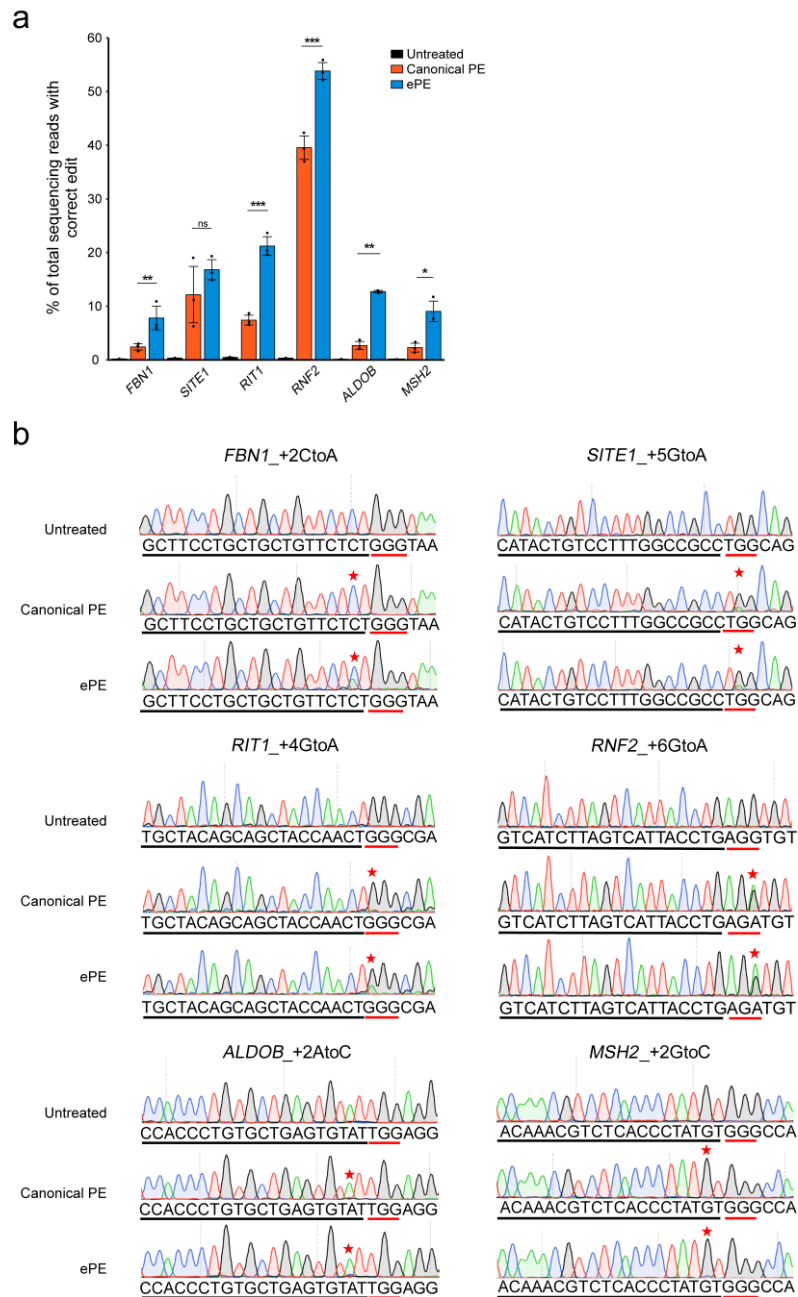

**Supplementary information, Fig. S10 ePE without nicking the non-edited strand also increases base transition and transversion efficiency.**

- Targeted editing efficiency of base transition and transversion by canonical PE and ePE without nicking the non-edited strand at six sites in HEK293T cells. Data are presented as mean values  $\pm$  SD,  $n = 3$  independent experiments, two-tailed student's t-test ( $*P < 0.05$ ,  $**P < 0.005$ ,  $***P < 0.0005$ ).
- Sanger sequencing chromatograms of the sites in (a). The PAM sequence and spacer sequence of



pegRNA are underlined in red and black, respectively. Asterisks indicate the desired editing.

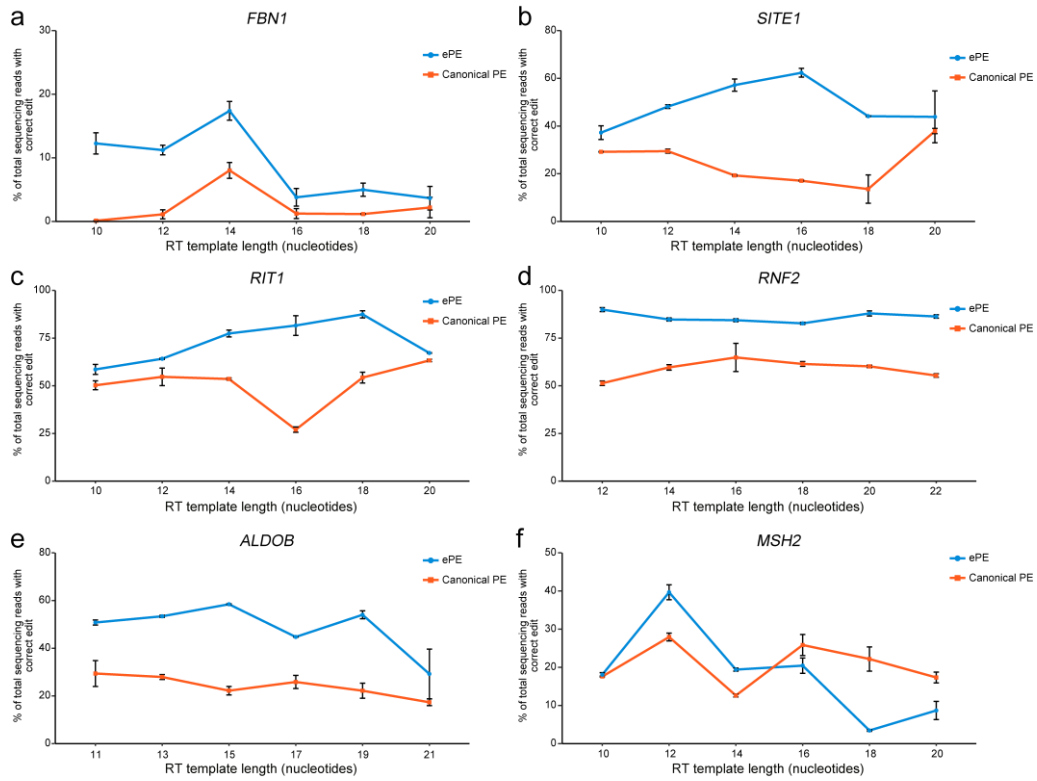

**Supplementary information, Fig. S11 Effects of RT template length on the efficiency of ePE in HEK293T cells.**

Targeted editing efficiency of base transition and transversion by canonical PE and ePE with different RT template lengths at six sites in HEK293T cells.

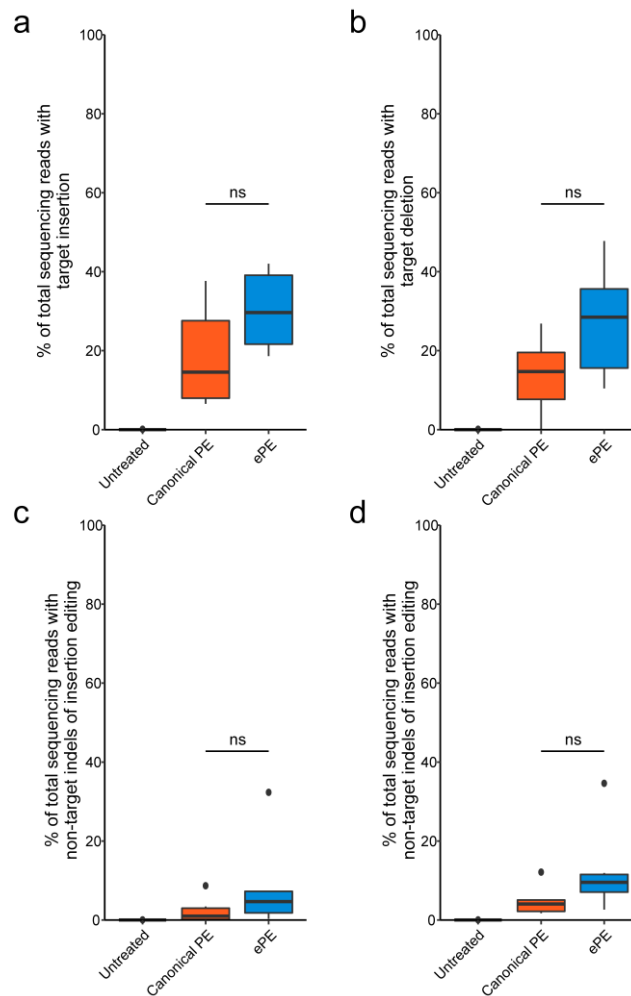

**Supplementary information, Fig. S12** ePE increases targeted precise deletion and insertion.

- Statistical analysis of editing efficiency of targeted precise insertion with canonical PE and ePE in **Fig. 1i**.
- Statistical analysis of editing efficiency of targeted precise deletion with canonical PE and ePE in **Fig. 1j**.
- Analysis of potential non-target indels induced by canonical PE and ePE in **Fig. 1i**.
- Analysis of potential non-target indels induced by canonical PE and ePE in **Fig. 1j**. Mean values  $\pm$  SD,  $n = 3$  independent experiments, two-tailed student's  $t$ -test ( $*P < 0.05$ ,  $**P < 0.005$ ,  $***P < 0.0005$ ).

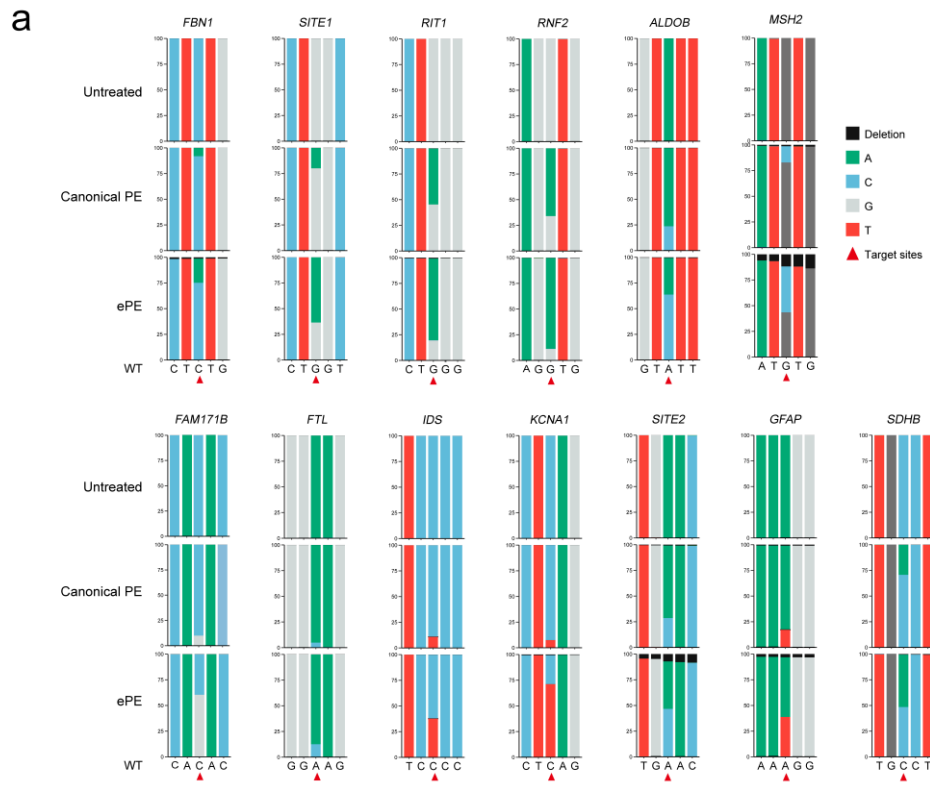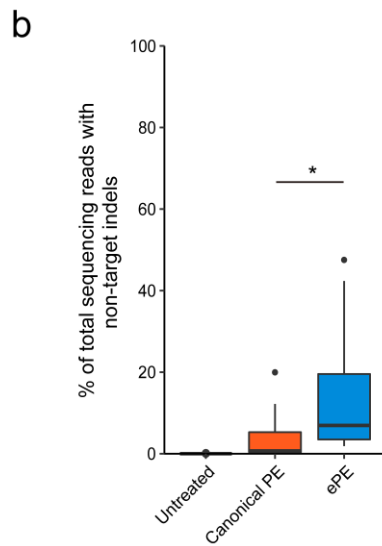

**Supplementary information, Fig. S13 Analysis of byproduct and non-target indel induced by canonical PE and ePE.**

**a.** Analysis of byproduct induced by targeted base conversions by canonical PE and EPE for 13 sites in HEK293T cells. Targeted base and nearby 2 bp sequence were shown. The red triangle indicates

the targeted base.

- b.** Statistical analysis of unintended indels induced by canonical PE and ePE for 13 sites in HEK293T cells. Mean values  $\pm$ SD, n=3 independent experiments (\* $P < 0.05$ , \*\* $P < 0.005$ , \*\*\* $P < 0.0005$ ).

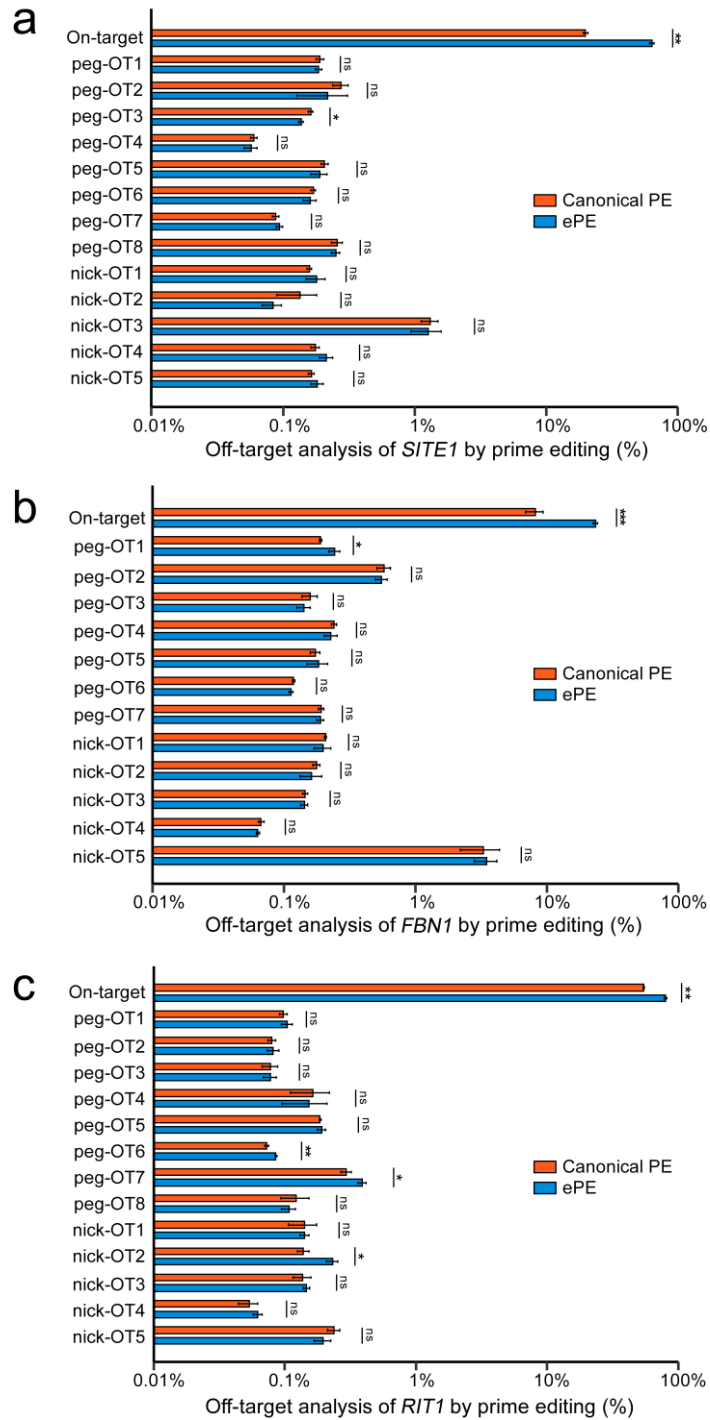

**Supplementary information, Fig. S14 Off-target analysis of prime editing induced by canonical PE and ePE.**

- a. Off-target analysis of prime editing for *SITE1* induced by canonical PE and ePE.
- b. Off-target analysis of prime editing for *FBN1* induced by canonical PE and ePE.
- c. Off-target analysis of prime editing for *RIT1* induced by canonical PE and ePE. Mean values  $\pm$  SD, n=3 independent experiments, two-tailed student's *t*-test (\* $P < 0.05$ , \*\* $P < 0.005$ , \*\*\* $P < 0.0005$ ).

**Supplementary information, Table S1 Primers used for constructing of pU6-Csy4RS-gRNA plasmids.**

| <b>NO.</b>            | <b>Forward primer</b>                                               |
|-----------------------|---------------------------------------------------------------------|
| Csy4peg-bone-F        | GAGAGGGTCTCAGTTTTAGAGCTAGAAATAGCAAGTTAAAATAAGGCTAGTCCGTTATC         |
| Csy4peg-bone-R        | CTCTCGGTCTCACGGTGTTCGTCCTTCCAC                                      |
| scaffold oligo-top    | AGAGCTAGAAATAGCAAGTTGAAATAAGGCTAGTCCGTTATCAACTTGAAAAAGTGGCACCGAGTCG |
| scaffold oligo-bottom | GCACCGACTCGGTGCCACTTTTTCAAGTTGATAACGGACTAGCCTTATTTCAACTTGCTATTTCTAG |

**Supplementary information, Table S2 pegRNAs and nick sgRNAs used in human cells.**

| NO.                 | gene           | Spacer sequence      | 3'-extension sequence            | Nick sgRNA sequence  | Length of PBS (nt) | Length of RT template (nt) | Type of mutations |
|---------------------|----------------|----------------------|----------------------------------|----------------------|--------------------|----------------------------|-------------------|
| <i>ALDOB</i>        | <i>ALDOB</i>   | CCACCCTGTGCTGAGTGAT  | TCTCTCCCTCCAAGACTCAGCACAGG       | TAGCTTCTATCCAATGCCA  | 13                 | 15                         | +2AtoC            |
| <i>FAM171B</i>      | <i>FAM171B</i> | ATCTGACCTTTTCTCCACAC | TAATTGTTCCGGTCTGGAGAAAAGGTC      | TAGACTAACTGTCCCTTTCT | 13                 | 14                         | +1CtoG            |
| <i>FBN1</i>         | <i>FBN1</i>    | GCTTCCTGCTGCTGTTCTCT | AGGCTTTACCCATAGAACAGCAGCAGG      | TTTACCCATAGAACAGCAGC | 13                 | 14                         | +2CtoA            |
| <i>KCNA1</i>        | <i>KCNA1</i>   | CCACCTCCCTGGCCATCCTC | AAGCGGATGACCCTAAGGATGGCCAGGGAG   | CAAGCGGATGACCCTAAGGA | 13                 | 17                         | +3CtoT            |
| <i>IDS</i>          | <i>IDS</i>     | TTGCCTATAGCCAGTATCCC | TCTGAAGGCCGGAGATACTGGCTATAG      | CCTATAGTCTATGGTGCCTA | 13                 | 14                         | +2CtoT            |
| <i>RIT1</i>         | <i>RIT1</i>    | TGCTACAGCAGCTACCAACT | GGAACTCGCCCTAGTTGGTAGCTGCTGT     | GATTCTGGAAGTCGCCTAGT | 13                 | 14                         | +4GtoA            |
| <i>RNF2</i>         | <i>RNF2</i>    | GTCATCTTAGTCATTACCTG | AACGAACATCTCAGGTAATGACTAAGATG    | TCAACCATTAAGCAAAACAT | 13                 | 16                         | +6GtoA            |
| <i>SITE1</i>        | <i>ALDOB</i>   | CATACTGTCTTTGGCCGCC  | GCTAACTGCTAGCCGCCAAAGGACAG       | AGGCAGACAGGGTCAAGGTG | 13                 | 14                         | +5GtoA            |
| <i>SITE2</i>        | <i>FAM171B</i> | TTGTGATCTCTCCATTGAAC | ACAGGAAGACCAGTGAATGGAGAGATC      | GTGTGAGGAGAACAGACAGT | 13                 | 15                         | +1AtoC            |
| <i>MSH2</i>         | <i>MSH2</i>    | ACAAACGTCTCACCTATGT  | ACATTTGGCCAGATAGGGTGAGACGT       | AAAGAAAACAGGGAGAGAAG | 13                 | 14                         | +2GtoC            |
| <i>FTL</i>          | <i>FTL</i>     | CGCGATGATGTGGCTCTGGA | GGCTCACGCCCTGCCAGGCCACATCAT      | CTGCCAGAGCCACATCATCG | 13                 | 14                         | +3AtoC            |
| <i>GFAP</i>         | <i>GFAP</i>    | AGCCTGTGTCCATATAAAGG | TTCCAACCTCTCATTATATGGACACA       | CCAGAATCCAATCTCCCTCA | 13                 | 14                         | +1AtoT            |
| <i>SDHB</i>         | <i>SDHB</i>    | CTCAGGTAATCCACCTGCCT | TTGGGAGGCCGAGTCAGGTGGATTACC      | ATTTTATAGGCCAGGCGTGG | 13                 | 14                         | +1CtoA            |
| <i>FAM171B_+2bp</i> | <i>FAM171B</i> | ATCTGACCTTTTCTCCACAC | TAATTGTTCCGGTGGAGAAAAGGTC        | TAGACTAACTGTCCCTTTCT | 13                 | 16                         | +2bp              |
| <i>FBN1_+2bp</i>    | <i>FBN1</i>    | GCTTCCTGCTGCTGTTCTCT | AGGCTTTACCCAGAGCGAACAGCAGCAGG    | TTTACCCATAGAACAGCAGC | 13                 | 16                         | +2bp              |
| <i>KCNA1_+2bp</i>   | <i>KCNA1</i>   | CCACCTCCCTGGCCATCCTC | AAGCGGATGACCCTGAGGTGATGGCCAGGGAG | CAAGCGGATGACCCTAAGGA | 13                 | 19                         | +2bp              |
| <i>RIT1_+2bp</i>    | <i>RIT1</i>    | TGCTACAGCAGCTACCAACT | GGAACTCGCCCTAGTTGGTAGCTGCTGT     | GATTCTGGAAGTCGCCTAGT | 13                 | 16                         | +2bp              |
| <i>MSH2_+2bp</i>    | <i>MSH2</i>    | ACAAACGTCTCACCTATGT  | ACATTTGGCCACAATTAGGGTGAGACGT     | AAAGAAAACAGGGAGAGAAG | 13                 | 16                         | +2bp              |
| <i>SDHB_+2bp</i>    | <i>SDHB</i>    | CTCAGGTAATCCACCTGCCT | TTGGGAGGCCGAGGCCACAGGTGGATTACC   | ATTTTATAGGCCAGGCGTGG | 13                 | 16                         | +2bp              |
| <i>SITE1_-2bp</i>   | <i>ALDOB</i>   | CATACTGTCTTTGGCCGCC  | GCTAACTGCCAGGCCAAAGGACAG         | AGGCAGACAGGGTCAAGGTG | 13                 | 12                         | -2bp              |
| <i>RIT1_-2bp</i>    | <i>RIT1</i>    | TGCTACAGCAGCTACCAACT | GGAACTCGCCCTAGTTGGTAGCTGCTGT     | GATTCTGGAAGTCGCCTAGT | 13                 | 12                         | -2bp              |
| <i>ALDOB_-2bp</i>   | <i>ALDOB</i>   | CCACCCTGTGCTGAGTGAT  | TCTCTCCCTCCAAGACTCAGCACAGG       | TAGCTTCTATCCAATGCCA  | 13                 | 13                         | -2bp              |
| <i>GFAP_-2bp</i>    | <i>GFAP</i>    | AGCCTGTGTCCATATAAAGG | TTCCAACCTCTCTTATATGGACACA        | CCAGAATCCAATCTCCCTCA | 13                 | 12                         | -2bp              |
| <i>MSH2_-2bp</i>    | <i>MSH2</i>    | ACAAACGTCTCACCTATGT  | ACATTTGGCCCATAGGGTGAGACGT        | AAAGAAAACAGGGAGAGAAG | 13                 | 12                         | -2bp              |
| <i>SDHB_-2bp</i>    | <i>SDHB</i>    | CTCAGGTAATCCACCTGCCT | TTGGGAGGCCGACAGGTGGATTACC        | ATTTTATAGGCCAGGCGTGG | 13                 | 12                         | -2bp              |

**Supplementary information, Table S3 pegRNAs used for indel test in human cells.**

| NO.                            | Spacer sequence      | 3'-extension sequence                           |
|--------------------------------|----------------------|-------------------------------------------------|
| <i>FBN1</i> -truncated pegRNA  | GCTTCCTGCTGCTGTTCTCT | NULL                                            |
| <i>FBN1</i> -RaPBS_ pegRNA     | GCTTCCTGCTGCTGTTCTCT | AGGCTTTACCCATACTAGCGTAGCTAC                     |
| <i>FBN1</i> -extended pegRNA   | GCTTCCTGCTGCTGTTCTCT | AGGCTTTACCCATAGAACAGCAGCAGGGTTCACTGCCGTATAGGCAG |
| <i>ALDOB</i> -truncated pegRNA | CCACCCTGTGCTGAGTGAT  | NULL                                            |
| <i>ALDOB</i> -RaPBS_ pegRNA    | CCACCCTGTGCTGAGTGAT  | TCTCTCCCTCCAAGACTAGCGTAGCTAC                    |
| <i>ALDOB</i> -extended pegRNA  | CCACCCTGTGCTGAGTGAT  | TCTCTCCCTCCAAGACTCAGCACAGGGTTCACTGCCGTATAGGCAG  |
| <i>SITE1</i> -truncated pegRNA | CATACTGTCCTTTGGCCGCC | NULL                                            |
| <i>SITE1</i> -RaPBS_ pegRNA    | CATACTGTCCTTTGGCCGCC | GCTAACTGCTAGGCCTAGCGTAGCTAC                     |
| <i>SITE1</i> -extended pegRNA  | CATACTGTCCTTTGGCCGCC | GCTAACTGCTAGGCGCCAAAGGACAGGTTCACTGCCGTATAGGCAG  |
| <i>FTL</i> -truncated pegRNA   | CGCGATGATGGCTCTGGA   | NULL                                            |
| <i>FTL</i> -RaPBS_ pegRNA      | CGCGATGATGGCTCTGGA   | GGCTCACGCCTGCCCTAGCGTAGCTAC                     |
| <i>FTL</i> -extended pegRNA    | CGCGATGATGGCTCTGGA   | GGCTCACGCCTGCCAGGCCACATCATGTTCACTGCCGTATAGGCAG  |



**Supplementary information, Table S4 pegRNAs and nick sgRNAs used in mouse N2a cells.**

| NO.           | gene          | Spacer sequence       | 3'-extension sequence        | Nick sgRNA sequence  | Length of PBS (nt) | Length of RT template (nt) | Type of mutations |
|---------------|---------------|-----------------------|------------------------------|----------------------|--------------------|----------------------------|-------------------|
| <i>Dnmt1</i>  | <i>Dnmt1</i>  | CGGGCTGGAGCTGTTTCGCGC | TGCAAGATGCCAGTGCGAACAGCTCCAG | CCGC GCGCGGAAAAAGCCG | 13                 | 15                         | +2GtoA            |
| <i>Fgf21</i>  | <i>Fgf21</i>  | GTTTTGCCTCACAGGTCTCC  | TTTGAGCTCCAGCAGACCTGTGAGGCA  | TGAGCTCCAGTAGACCTGTG | 13                 | 14                         | +2CtoG            |
| <i>Ilnar1</i> | <i>Ilnar1</i> | AGACGGGAACATGTGGGCAC  | AAGGTTTTCTCCAGAGCCACATGTTCCC | AGACTTCTGCCAGATTCGTA | 13                 | 15                         | +2AtoT            |
| <i>Trem2</i>  | <i>Trem2</i>  | TATTATGGAGGCTGGAGTCC  | TGGAGTGTACCAGAACTCCAGCCTCCAT | AAGAACACGAATGAGCCAGT | 13                 | 15                         | +2CtoT            |
| <i>Rnf2</i>   | <i>Rnf2</i>   | AGGATGTATTATATTACCTG  | AACGAACACCTCCGGTAATATAATACA  | TCAACCATTAAGCAAAACAT | 13                 | 14                         | +2TtoG            |
| <i>Tyr</i>    | <i>Tyr</i>    | GAAGTGCCTGAGCACTGGC   | ATAATAGGACCTGCAAGTGCTCAGGCAA | GGACCTCAGTCCCCTTCAA  | 13                 | 15                         | +1GtoT            |
| <i>Fgf5</i>   | <i>Fgf5</i>   | GGCAGCCTGACTGCAGAGT   | AAACCGATGCCACGCTGCAGTACAGGC  | GAGCCATTGACTTTGCCATC | 13                 | 15                         | +1AtoC            |
| <i>Mstn</i>   | <i>Mstn</i>   | CAGAGGGATGACAGCAGTGA  | TCCAAGAGCCATCGCTGCTGCATCCC   | CATGGTAATGATTGTTTCCG | 13                 | 15                         | +1TtoC            |
| <i>Cftr</i>   | <i>CFTR</i>   | GGGGTTATGTGCTAAGCCA   | TGCTTATGGCCATGACTTAGCACATAAC | GGCCTTACTGAGAACTGATC | 13                 | 15                         | +1CtoT            |
| <i>HOXD13</i> | <i>HOXD13</i> | GAGGCATACATCTCCATGGA  | GACTGGTAGCACTCCATGGAGATGTATG | GATCCTTGGCACAGTACACC | 13                 | 15                         | +6GtoT            |
| <i>SITE3</i>  | <i>HOXD13</i> | AGTTCATTAACAAGGACAAG  | GATCCGCCGCCCTTGCTTGTTAATG    | CCTTCGATTCTGAAACAAA  | 13                 | 15                         | +4CtoG            |
| <i>Ar</i>     | <i>Ar</i>     | TCTCACTTGTGGCAGCTGCA  | TGAAGAAGACCTTGAAGCTGCCACAAGT | AGGGGAAAATATCAGGAAGT | 13                 | 15                         | +1GtoT            |
| SITE4         | <i>Tyr</i>    | CATTGACAGATGAGTACT    | GACGACCTCCCAATTACTCATCTGTGCA | CAGGAGGAGAAGAAGGATGC | 13                 | 15                         | +2CtoA            |

**Supplementary information, Table S5 Primers used for cell genomic DNA amplification and targeted deep sequencing.**

| NO.                 | Forward primer               | Reverse primer         | Length of amplicon (nt) |
|---------------------|------------------------------|------------------------|-------------------------|
| <i>SITE1</i>        | CTGAGTGAAGGTTTGACTGG         | CTCCTACTAGAAGCACTGGAG  | 238                     |
| <i>FAM171B</i>      | GGTAATGAGGAGGCGTATGGGC       | GGGCAAGGCTGCGTAAAGT    | 213                     |
| <i>FBN1</i>         | TCGACCTCGAGGAGACAATG         | GGGCTGAGAGGACTGATCTTT  | 252                     |
| <i>KCNA1</i>        | CACCGAGATAGCTGAGCAGG         | GGATGACCCCGATGAAGAGG   | 206                     |
| <i>IDS</i>          | ACGTTGAGCTGTGCAGAGAA         | TTGAAGCCAACCCACACAGT   | 235                     |
| <i>RIT1</i>         | GTATGGAAAGGTAAGGCACTG        | CCTACCACTCTCCCTACACC   | 237                     |
| <i>RNF2</i>         | ACGTAGGAATTTGGTGGGACA        | ACGTCTCATATGCCCTTGG    | 218                     |
| <i>ALDOB</i>        | CCTCATTGCCAATGGATCAG         | GAGCCCTCACTTTGGGTGTT   | 235                     |
| <i>SITE2</i>        | GGCAAACAAGGGAGTAATTC         | AGAGAGACGGGAAGCCATTG   | 262                     |
| <i>MSH2</i>         | CTCAGCATTAGTCTCTCC           | TCGCATTTGCACTAGTCCTC   | 239                     |
| <i>FTL</i>          | TTTGTGCGGTGCGGTAAACA         | CTGCTGGGAGATGATGCCAT   | 269                     |
| <i>GFAP</i>         | GCCCCTGTGTTTCATTCATG         | ACCACCGCTTACAGCTGTG    | 250                     |
| <i>SDHB</i>         | GCCATCGTGCCTGTCTAATT         | AGTCGACATATCCCAACATC   | 260                     |
| <i>Dnmt1</i>        | TTGCCCTGTGTGTACATGC          | AATATATGCCTCGGCATCGG   | 251                     |
| <i>Fgf21</i>        | AGGATGGAACAGTGGTAGGC         | CATAGAGAGCTCCATCTGGC   | 240                     |
| <i>Ifnar1</i>       | GCCATACTAGTCCACATCTC         | CTGGCAAGAGTTCTGGTATC   | 250                     |
| <i>Trem2</i>        | GACCTACCTCAGCAACACT          | CTCACAGCTCCTCAGTGAC    | 251                     |
| <i>Rnf2</i>         | GTCTCAGGCTGTGCAGACAA         | CAAGACGCAAGACTGTTATG   | 206                     |
| <i>Tyr</i>          | CAGCTTTCAGGCAGAGGTTTC        | CAAGACTCGCTTCTGTAC     | 213                     |
| <i>FGF5</i>         | TCCTCACCAGTCGCAGCTTC         | GCCTGTGGCCAAAGGAATC    | 246                     |
| <i>MSTN</i>         | ATCCTCAGTAAGCTGCGCCT         | ACACTAGGACAGCAGTCAGC   | 250                     |
| <i>CFTR</i>         | GCCCCTTCTAAGCACAGTGT         | TAGATGGGCACTGGGCTCAT   | 204                     |
| <i>Hoxd13</i>       | CTACACAAGTCCCTATCAGC         | CGTTGCTCCTACCTGGAAAG   | 209                     |
| <i>SITE3</i>        | TAAACCAGCCGACATGTGC          | GCCCACATCAGGAGACAGTG   | 144                     |
| <i>Ar</i>           | CAGTTTGGACAGTACCAGGG         | TCTGCTAGGCAAAAGAGAAGGG | 209                     |
| <i>SITE4</i>        | GAGAATAACTGGGATGAG           | GAGCATGAAAATGTGGCTGC   | 216                     |
| <i>FAM171B_+2bp</i> | GGTAATGAGGAGGCGTATGGGC       | GGGCAAGGCTGCGTAAAGT    | 213                     |
| <i>FBN1_+2bp</i>    | NNNNNNNTCGACCTCGAGGAGACAATG  | GGGCTGAGAGGACTGATCTTT  | 260                     |
| <i>KCNA1_+2bp</i>   | CACCGAGATAGCTGAGCAGG         | GGATGACCCCGATGAAGAGG   | 206                     |
| <i>RIT1_+2bp</i>    | NNNNNNNGTATGGAAAGGTAAGGCACTG | CCTACCACTCTCCCTACACC   | 245                     |
| <i>SITE2_+2bp</i>   | GGCAAACAAGGGAGTAATTC         | AGAGAGACGGGAAGCCATTG   | 262                     |
| <i>MSH2_+2bp</i>    | NNNNNNNCTCAGCATTAGTCTCTCC    | TCGCATTTGCACTAGTCCTC   | 247                     |
| <i>SDHB_+2bp</i>    | NNNNNNNGCCATCGTGCCTGTCTAATT  | AGTCGACATATCCCAACATC   | 268                     |
| <i>SITE1_-2bp</i>   | CTGAGTGAAGGTTTGACTGG         | CTCCTACTAGAAGCACTGGAG  | 238                     |
| <i>RIT1_-2bp</i>    | NNNNNNNGTATGGAAAGGTAAGGCACTG | CCTACCACTCTCCCTACACC   | 245                     |
| <i>ALDOB_-2bp</i>   | NNNNNNNCCTCATTGCCAATGGATCAG  | GAGCCCTCACTTTGGGTGTT   | 243                     |
| <i>SITE2_-2bp</i>   | NNNNNNNGGCAAACAAGGGAGTAATTC  | AGAGAGACGGGAAGCCATTG   | 270                     |
| <i>GFAP_-2bp</i>    | NNNNNNGCCCTGTGTTTCATTCATG    | ACCACCGCTTACAGCTGTG    | 256                     |
| <i>MSH2_-2bp</i>    | NNNNNNNCTCAGCATTAGTCTCTCC    | TCGCATTTGCACTAGTCCTC   | 247                     |
| <i>SDHB_-2bp</i>    | NNNNNNNGCCATCGTGCCTGTCTAATT  | AGTCGACATATCCCAACATC   | 268                     |

**Supplementary information, Table S6 Information of predicted off-target sites.**

| NO.            | Chr. | Off-target site          | Mis-matches |
|----------------|------|--------------------------|-------------|
| SITE1-peg-OT1  | 1    | CATAaTGTCCCTTTGGaaGCCAGG | 3           |
| SITE1-peg-OT2  | 19   | CcTACTGTCCTTTGGgaGCCTGG  | 3           |
| SITE1-peg-OT3  | 4    | gATACTGTCCTTgGGgCGCCAGG  | 3           |
| SITE1-peg-OT4  | 10   | CiTtCTGTCCTTTGGCgGCaGGG  | 4           |
| SITE1-peg-OT5  | 10   | CcTiCTGcCCTTTIGCCGCCTGG  | 4           |
| SITE1-peg-OT6  | 1    | gATiCTGTCTTgTGGCaGCCTGG  | 4           |
| SITE1-peg-OT7  | 11   | aATACTGgCCTTTGGCIGgCTGG  | 4           |
| SITE1-peg-OT8  | 11   | CAcACTGTCCTTTtCCaCCGGG   | 4           |
| SITE1-nick-OT1 | 14   | AGGCAGcCAGGGTCcAGGTGGGG  | 2           |
| SITE1-nick-OT2 | 6    | gaGCAGACAGGGTCAAGGTGTGG  | 2           |
| SITE1-nick-OT3 | 10   | AatCAGcCAGGGTCAAGGTGTGG  | 3           |
| SITE1-nick-OT4 | 11   | AGGgtGgCAGGGTCAAGGTGTGG  | 3           |
| SITE1-nick-OT5 | 1    | AGGCAGAgAGGGTgAAIGTGGGG  | 3           |
| FBN1-peg-OT1   | 17   | GCTTCCTGCTGCTGaTCTCTGGG  | 1           |
| FBN1-peg-OT2   | 3    | GCTTCCTcCTGgTGTCTCTTGG   | 2           |
| FBN1-peg-OT3   | 10   | GTaCCTGCTGCTGTTtTCTGGG   | 3           |
| FBN1-peg-OT4   | 10   | aCTTCCTGCTGtTtTCTCTAGG   | 3           |
| FBN1-peg-OT5   | 10   | iCTTCCTGCTGCTGTaCTCaTGG  | 3           |
| FBN1-peg-OT6   | 10   | GCTTCCTcaTGaTGTCTCTGGG   | 3           |
| FBN1-peg-OT7   | 10   | GCTTCCTGCTtCTGTcCaCTGGG  | 3           |
| FBN1-nick-OT1  | 10   | TTTACCcATcGAAaIcAGCAGG   | 3           |
| FBN1-nick-OT2  | 11   | TTaACCcAgAGAACAGaAGCAGG  | 3           |
| FBN1-nick-OT3  | 15   | TTTcCCcATAGAACAgAGCAGG   | 3           |
| FBN1-nick-OT4  | 15   | TTTcCCcAcAGAACAGtAGCTGG  | 3           |
| FBN1-nick-OT5  | 16   | gTTACCcATgGAAaAGCAGCCGG  | 3           |
| RIT1-peg-OT1   | 17   | TGCTAaAGCAGCTACCIaCTTGG  | 2           |
| RIT1-peg-OT2   | 12   | TGCTACiGCAGCTcCCAgCTGGG  | 3           |
| RIT1-peg-OT3   | 12   | TtCTgCAGCAGaTACCAaCTGGG  | 3           |
| RIT1-peg-OT4   | 13   | TGCTACAGaAGCagCCAaCTAGG  | 3           |
| RIT1-peg-OT5   | 14   | TGCTiCAGCAGaTACCAgCTGGG  | 3           |
| RIT1-peg-OT6   | 15   | TGtTcCAGaAGCTACCAaCTGGG  | 3           |
| RIT1-peg-OT7   | 2    | TtCTgCAGCAGaTACCAaCTGGG  | 3           |
| RIT1-peg-OT8   | 2    | TGCaACAGCAGCaACCAcCTGGG  | 3           |
| RIT1-nick-OT1  | 4    | GATTCTGGAAaTcCCTtGTGGG   | 3           |
| RIT1-nick-OT2  | 11   | GcTTCTGGAACTCaCCTccTGGG  | 4           |
| RIT1-nick-OT3  | 12   | GATTCTGGAtCTIGCCTgGcTGG  | 4           |
| RIT1-nick-OT4  | 13   | GAcTCTGGgcCTCGCCTtGTAGG  | 4           |
| RIT1-nick-OT5  | 13   | GATTtTGGAtTCGCCTaITGGG   | 4           |

**Supplementary information, Table S7 Primers used for off-target analysis.**

| NO.            | Forward primer         | Reverse primer         | Length of amplicon (nt) |
|----------------|------------------------|------------------------|-------------------------|
| SITE1-peg-OT1  | CTAGGCACCTTGGAAAGCTGC  | AGTACCAATGCCACCTCCTCC  | 257                     |
| SITE1-peg-OT2  | CCACGGACAGCAACAACCTCC  | AGACAGTCTCAGAGCTGAGG   | 214                     |
| SITE1-peg-OT3  | CACAGGAAAGGGCGCTGCA    | AGTCCACACAGGCAGCAAGC   | 249                     |
| SITE1-peg-OT4  | CCGGCCCTGAACATCGTTCT   | CTCTCCTGTTCCCTGACTG    | 194                     |
| SITE1-peg-OT5  | TGCGCTCTGCACTCTCTGCT   | GGGAAGGTGACCACAGTCAG   | 243                     |
| SITE1-peg-OT6  | GGTGGTCCCAAAAGTTACCA   | GTCTCCTAGAATCCACAGG    | 218                     |
| SITE1-peg-OT7  | GCCCTTTCACCCAGAGTCCC   | CCCAGCTTGTACGATCAAGG   | 221                     |
| SITE1-peg-OT8  | CCAGCCCACAGAGAATCATG   | CTTGAAAGGCCTGGAGAGG    | 234                     |
| SITE1-nick-OT1 | GGCACATCATCCATTACAGT   | CTGGATCTAGCCAGCGAGAC   | 201                     |
| SITE1-nick-OT2 | GTGAATGAGACAGCCAGAG    | CTCTGCATGAGGTTCTGTGC   | 210                     |
| SITE1-nick-OT3 | GGGAAGATGAAGCTGGGGTA   | CCTCCTGCTTCTGGAGACAG   | 147                     |
| SITE1-nick-OT4 | CTGCAGATCTTCTCCACCAGG  | GTGCCTGCTGATGGGCAGAA   | 219                     |
| SITE1-nick-OT5 | GAGAGGAGCAAGCATGGGGA   | CCAGCCTTCCCTACACCTC    | 232                     |
| FBN1-peg-OT1   | GGTACCCTTTTCTGAGCGA    | TGGTACTCAAGCCGGAGAG    | 246                     |
| FBN1-peg-OT2   | GTCTGGGAATCGACGCTGAC   | TGAATCCGTCTGGTCTGGAC   | 259                     |
| FBN1-peg-OT3   | CCTGCTGGATCTTGGTTCCC   | AGAAAAGGGAGAACATGCTGC  | 252                     |
| FBN1-peg-OT4   | GGATTCCAACAGCTCAGAAC   | CTGTTTCAGGGCTCACTAG    | 248                     |
| FBN1-peg-OT5   | CTAGTCTCTAGCTCTCTCCT   | CACCCCTGAAGAACATTCC    | 254                     |
| FBN1-peg-OT6   | GGTCAGGGTCTTCCAGCCA    | GGAGACTTAGAGAGGGTCC    | 217                     |
| FBN1-peg-OT7   | GAGAAGTTGGTACCTTCCC    | TAGGCCAACAGGTCACCCT    | 227                     |
| FBN1-nick-OT1  | TCCAGAGTGACCATAGAATC   | CCACCCCAATATTAGGTGGT   | 240                     |
| FBN1-nick-OT2  | AGTGGGTAAACACTACCGGC   | AGGTCATGTCTGCCTTGATT   | 239                     |
| FBN1-nick-OT3  | CATCACCTTGCACTGGTATA   | TAACCTCAGAGTAACTGAC    | 231                     |
| FBN1-nick-OT4  | ATGCTACCTGGCGGGATTTTG  | AGAAAAGGAGCAAAGGGGGCT  | 190                     |
| FBN1-nick-OT5  | CTGACCGATGGAAAAAGCC    | GCTAGGTTCTGCTGCGTTTCT  | 196                     |
| RIT1-peg-OT1   | AGAGACCAAGGAGGACTGT    | TCACCAGAAACGAAACACCAC  | 221                     |
| RIT1-peg-OT2   | GGTTCCAGCAGCCATTCT     | GGAGAAAGAATTCGACCAAG   | 196                     |
| RIT1-peg-OT3   | TGGACTTGCCACTGGTAATGT  | AAATGTGCTCTTACCCAGCA   | 232                     |
| RIT1-peg-OT4   | GACATTTTCATCAGTGATGCC  | GCGGGAGTATCCACAGAATACT | 191                     |
| RIT1-peg-OT5   | TCTTCTCCTACTATGCTATC   | TTCCCACATGCCTTGCCTCAT  | 220                     |
| RIT1-peg-OT6   | TCAGGATCCTAGCAGGAAGCA  | CTCTAATCTCATATCTGGGG   | 201                     |
| RIT1-peg-OT7   | CAGACTTGACTGGCATTGC    | CCTTTGCTCTCACACCACTAC  | 233                     |
| RIT1-peg-OT8   | TCTGCTGCTTTGTTGGAGACAC | AGGTTCCCTTGTCTACTAGC   | 237                     |
| RIT1-nick-OT1  | AGCCTCACAATAATGCTGACC  | CTTGAGAAACACAGGGTTGT   | 250                     |
| RIT1-nick-OT2  | TGAGAAGGCTGGGCAGGAAAT  | CCTTCCACTCCAGCCTGA     | 226                     |
| RIT1-nick-OT3  | GTTCCGTGTGAAATGTGTC    | CCAAAGACATCTCCCCTGA    | 218                     |
| RIT1-nick-OT4  | AGTTATTTGAGTCTGGGGG    | GCAATGATCAGCACCAGCT    | 187                     |
| RIT1-nick-OT5  | CAGAGTCCAAATCCTTCAGG   | CAGCAATTACAGAGGAACAG   | 240                     |
